# Supplementary material for: Dual-Channel NIR-II/Red Probe for Simultaneously Visualizing Mitochondrial Viscosity and NAD(P)H Dynamics Reveals Cuproptosis Mechanisms
Source: Research Square preprint supplement (doi:10.21203/rs.3.rs-7386027/v1), 2025-11-25
Supplement: Supplementary file 1 [file 5f5329bbb8557d8eb5b1b6cd.docx]

**Supporting Information**

**Dual-Channel NIR-II/Red Probe for Simultaneously Visualizing Mitochondrial Viscosity and NAD(P)H Dynamics Reveals Cuproptosis Mechanisms**

Zhiwen Zhao1, Ying Dang2, Shihao Sun1, Xinyue Li1, Xue Zhang1, Wenting Guo1*, Baodui Wang1*

1 Z. Zhao, Y. Dang, S. Sun, X. Li, X. Zhang, W. Guo, Prof. B. Wang

State Key Laboratory of Applied Organic Chemistry and Key Laboratory of Nonferrous Metal Chemistry and Resources Utilization of Gansu Province, Lanzhou University, Lanzhou, 730000, P. R. China.

E-mail: [guowenting@mail.lzjtu.cn](mailto:guowenting@mail.lzjtu.cn); [wangbd@lzu.edu.cn](mailto:wangbd@lzu.edu.cn).

2 Y. Dang

The Second Hospital & Clinical Medical School, Lanzhou University, Lanzhou, 730030, P. R. China.

**Experimental Section**

**Synthesis Experiment**


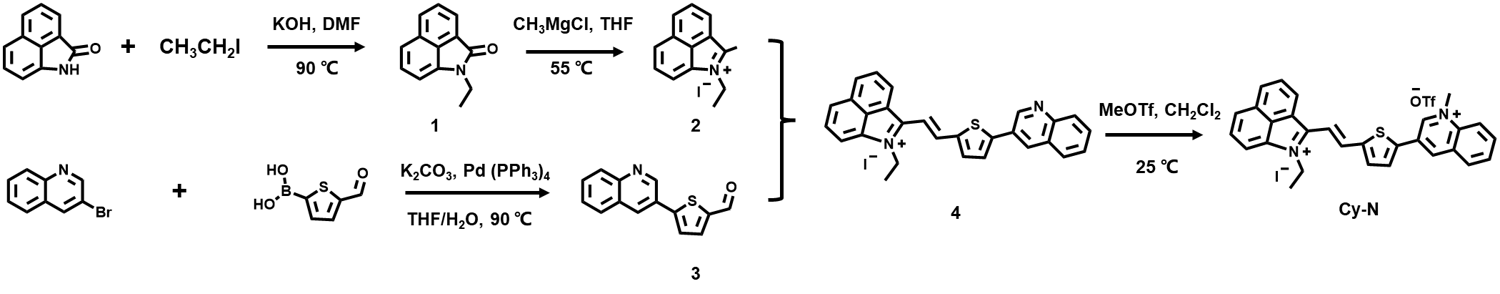


**Supplementary Fig 1.** Synthetic route for **Cy-N**.

**Synthesis of compound 1:** 1,8-Naphthaolactam (507 mg, 3 mmol) and potassium hydroxide (560 mg, 10 mmol) were dissolved in anhydrous DMF (10 mL) under nitrogen atmosphere. The reaction mixture was stirred for 10 min at 30 °C and iodoethane (0.75 mL, 10 mmol) was introduced into the system. After stirring at 90 °C for 12 h, the reaction was cooled at room temperature and extracted with ethyl acetate, then concentrated. The crude product was purified via silica gel column chromatography with PE / EtOAc (10:1 v/v) as the eluent to afford a yellow oil product (yield 89.5%). 1H NMR (400 MHz, Chloroform-*d*): δ 8.12-7.95 (m, 2H), 7.71 (ddd, J=8.9, 7.0, 1.9 Hz, 1H), 7.57-7.50 (m, 1H), 7.47 (ddd, J=8.8, 6.8, 1.9 Hz, 1H), 6.92 (ddd, J=6.9, 1.9, 0.7 Hz, 1H), 3.99 (qd, J=7.3, 1.9 Hz, 2H), 1.38 (td, J=7.3, 1.9 Hz, 3H). ESI-MS: m/z calcd. for **1** (C13H11NO, [M+H]+), 197.2370; found, 198.0573.

**Synthesis of compound 2:** A solution of compound **1** (493 mg, 2.5 mmol) in anhydrous THF (20 mL) was cooled to 0 °C, and methyl magnesium chloride (3 M solution in THF, 1 mL, 3mmol) was added into the system. The reaction was stirred at 55 °C for 1 h under nitrogen atmosphere. After cooling to room temperature, the reaction neutralized by adding 1 M hydrochloric acid, then was poured into saturated sodium iodide solution to form crystallization, obtaining brown precipitates. The precipitates were filtered, washed by water and ethyl acetate, and then dried under vacuum to give a dark brown solid (yield, 70.1%). 1H NMR (400 MHz, DMSO-*d6*): δ 8.98 (d, J=7.3 Hz, 1H), 8.80 (d, J=8.1 Hz, 1H), 8.54 (d, J=7.4 Hz, 1H), 8.45 (d, J=8.3 Hz, 1H), 8.18 (t, J=7.7 Hz, 1H), 8.01 (t, J=7.8 Hz, 1H), 4.72 (q, J=7.3 Hz, 2H), 1.55 (t, J=7.3 Hz, 3H). ESI-MS: m/z calcd. for **2** (C14H14IN+, [M-I]+), 196.1121; found, 196.0760.

**Synthesis of compound 3:** 3-Bromoquinoline (520 mg, 2.5 mmol) and 5-formyl-2-thiopheneboronic acid (390 mg, 2.5 mmol) were dissolved in THF/H2O (v/v:6/1) solution. Under N2 atmosphere, the catalytic content of 5 mol% Pd(PPh3)4 and K2CO3 (864 mg, 6.25 mmol) were added and stirred at 90 °C for 8 h. After the reaction was completed, the mixture was extracted with dichloromethane (3×20 mL), then concentrated. The crude product was purified via silica gel column chromatography with PE/ EtOAc (10:1 v/v) as the eluent to afford the target product (yield 29.2%). 1H NMR (400 MHz, Chloroform-*d*) δ 9.95 (s, 1H), 9.23 (d, J=2.4 Hz, 1H), 8.39 (d, J=2.5 Hz, 1H), 8.13 (d, J=8.5 Hz, 1H), 7.90 (d, J=8.2 Hz, 1H), 7.83 (d, J=3.9 Hz, 1H), 7.77 (t, J=7.7 Hz, 1H), 7.61 (dd, J=10.3, 5.6 Hz, 2H). 13C NMR (101 MHz, Chloroform-*d*) δ 182.82, 148.19, 137.48, 133.00, 132.27, 132.17, 132.09, 128.33, 127.88, 125.38, 130.61, 129.55, 128.70, 128.58. ESI-MS: m/z calcd. for **3** (C14H9NOS, [M+H]+), 239.0405; found, 240.0035.

**Synthesis of compound 4:** Compound **2** (239 mg, 1 mmol) and compound **3** (323 mg, 1 mmol) were dissolved in Toluene/1-butanol (v/v:1/1) solution and stirred overnight at 100 °C. After completion, the solution was cooled to room temperature and concentrated. Then, the solvent was removed under reduced pressure and the solid residue was purified by column chromatography on silica gel with DCM/MeOH (20:1 v/v) to give compound **4** (yield, 42.4%). 1H NMR (400 MHz, DMSO-*d*6) δ 9.39 (d, J=2.3 Hz, 1H), 9.33 (d, J=7.4 Hz, 1H), 9.08 (d, J=15.7 Hz, 1H), 8.81 (s, 1H), 8.72 (d, J=8.1 Hz, 1H), 8.38 (d, J=7.4 Hz, 1H), 8.34 (d, J=8.2 Hz, 1H), 8.30 (d, J=4.0 Hz, 1H), 8.19 (d, J=7.8 Hz, 1H), 8.15 (d, J=4.0 Hz, 1H), 8.10–8.05 (m, 2H), 7.96 (t, J=7.8 Hz, 1H), 7.83 (t, J=7.8 Hz, 1H), 7.73–7.68 (m, 2H), 4.86 (q, J=7.3 Hz, 2H), 1.55 (t, J=7.2 Hz, 3H). 13C NMR (101 MHz, DMSO-*d6*) δ 160.09, 149.38, 147.65, 147.20, 144.38, 141.09, 138.46, 134.62, 132.12, 130.80, 129.86, 128.60, 127.70, 127.17, 125.61, 122.90, 118.89, 112.85, 41.23, 15.52. ESI-MS: m/z calcd. for **4** (C28H21IN2S+, [M-I]+), 417.1420; found, 417.2121.

**Synthesis of Cy-N:** Under N2 atmosphere, compound 4 (109 mg, 0.2 mmol) and MeOTf (65 mg, 0.4 mmol) were dissolved in dichloromethane (5 ml) and stirred 24 h at 25 °C. TLC was employed for monitoring the progress of the reaction. After completion, the solid residue was purified by column chromatography on silica gel with DCM/MeOH (10:1 v/v) to afford the final product **Cy-N** (yield, 61.8%). 1H NMR (400 MHz, TFA-*d*) δ 10.12 (s, 1H), 9.83 (s, 1H), 9.45 (d, J=7.4 Hz, 1H), 9.31 (d, J=15.6 Hz, 1H), 9.13 (d, J=8.1 Hz, 1H), 8.95 (d, J=8.1 Hz, 1H), 8.91 (d, J=9.1 Hz, 1H), 8.87–8.78 (m, 2H), 8.70–8.63 (m, 2H), 8.61 (d, J=7.3 Hz, 1H), 8.48 (d, J=7.9 Hz, 1H), 8.44 (d, J=8.5 Hz, 2H), 8.12 (d, J=15.7 Hz, 1H), 5.37 (s, 3H), 5.31 (dd, J=14.1, 7.2 Hz, 2H), 2.30 (t, J=7.1 Hz, 3H). 13C NMR (101 MHz, TFA-*d*) δ 148.91, 146.12, 145.52, 145.01, 144.93, 140.88, 140.57, 140.51, 139.95, 139.47, 136.62, 133.97, 133.88, 133.35, 133.31, 132.48, 132.28, 132.26, 131.53, 130.52, 129.81, 126.08, 121.29, 119.92, 56.65, 47.78, 44.09, 16.52, 16.43. ESI-MS: m/z calcd. for **Cy-N** (C30H24F3IN2O3S2+, [M-I--OTf]2+/2), 216.0825; found, 216.0424.

**Supporting Figures**

**
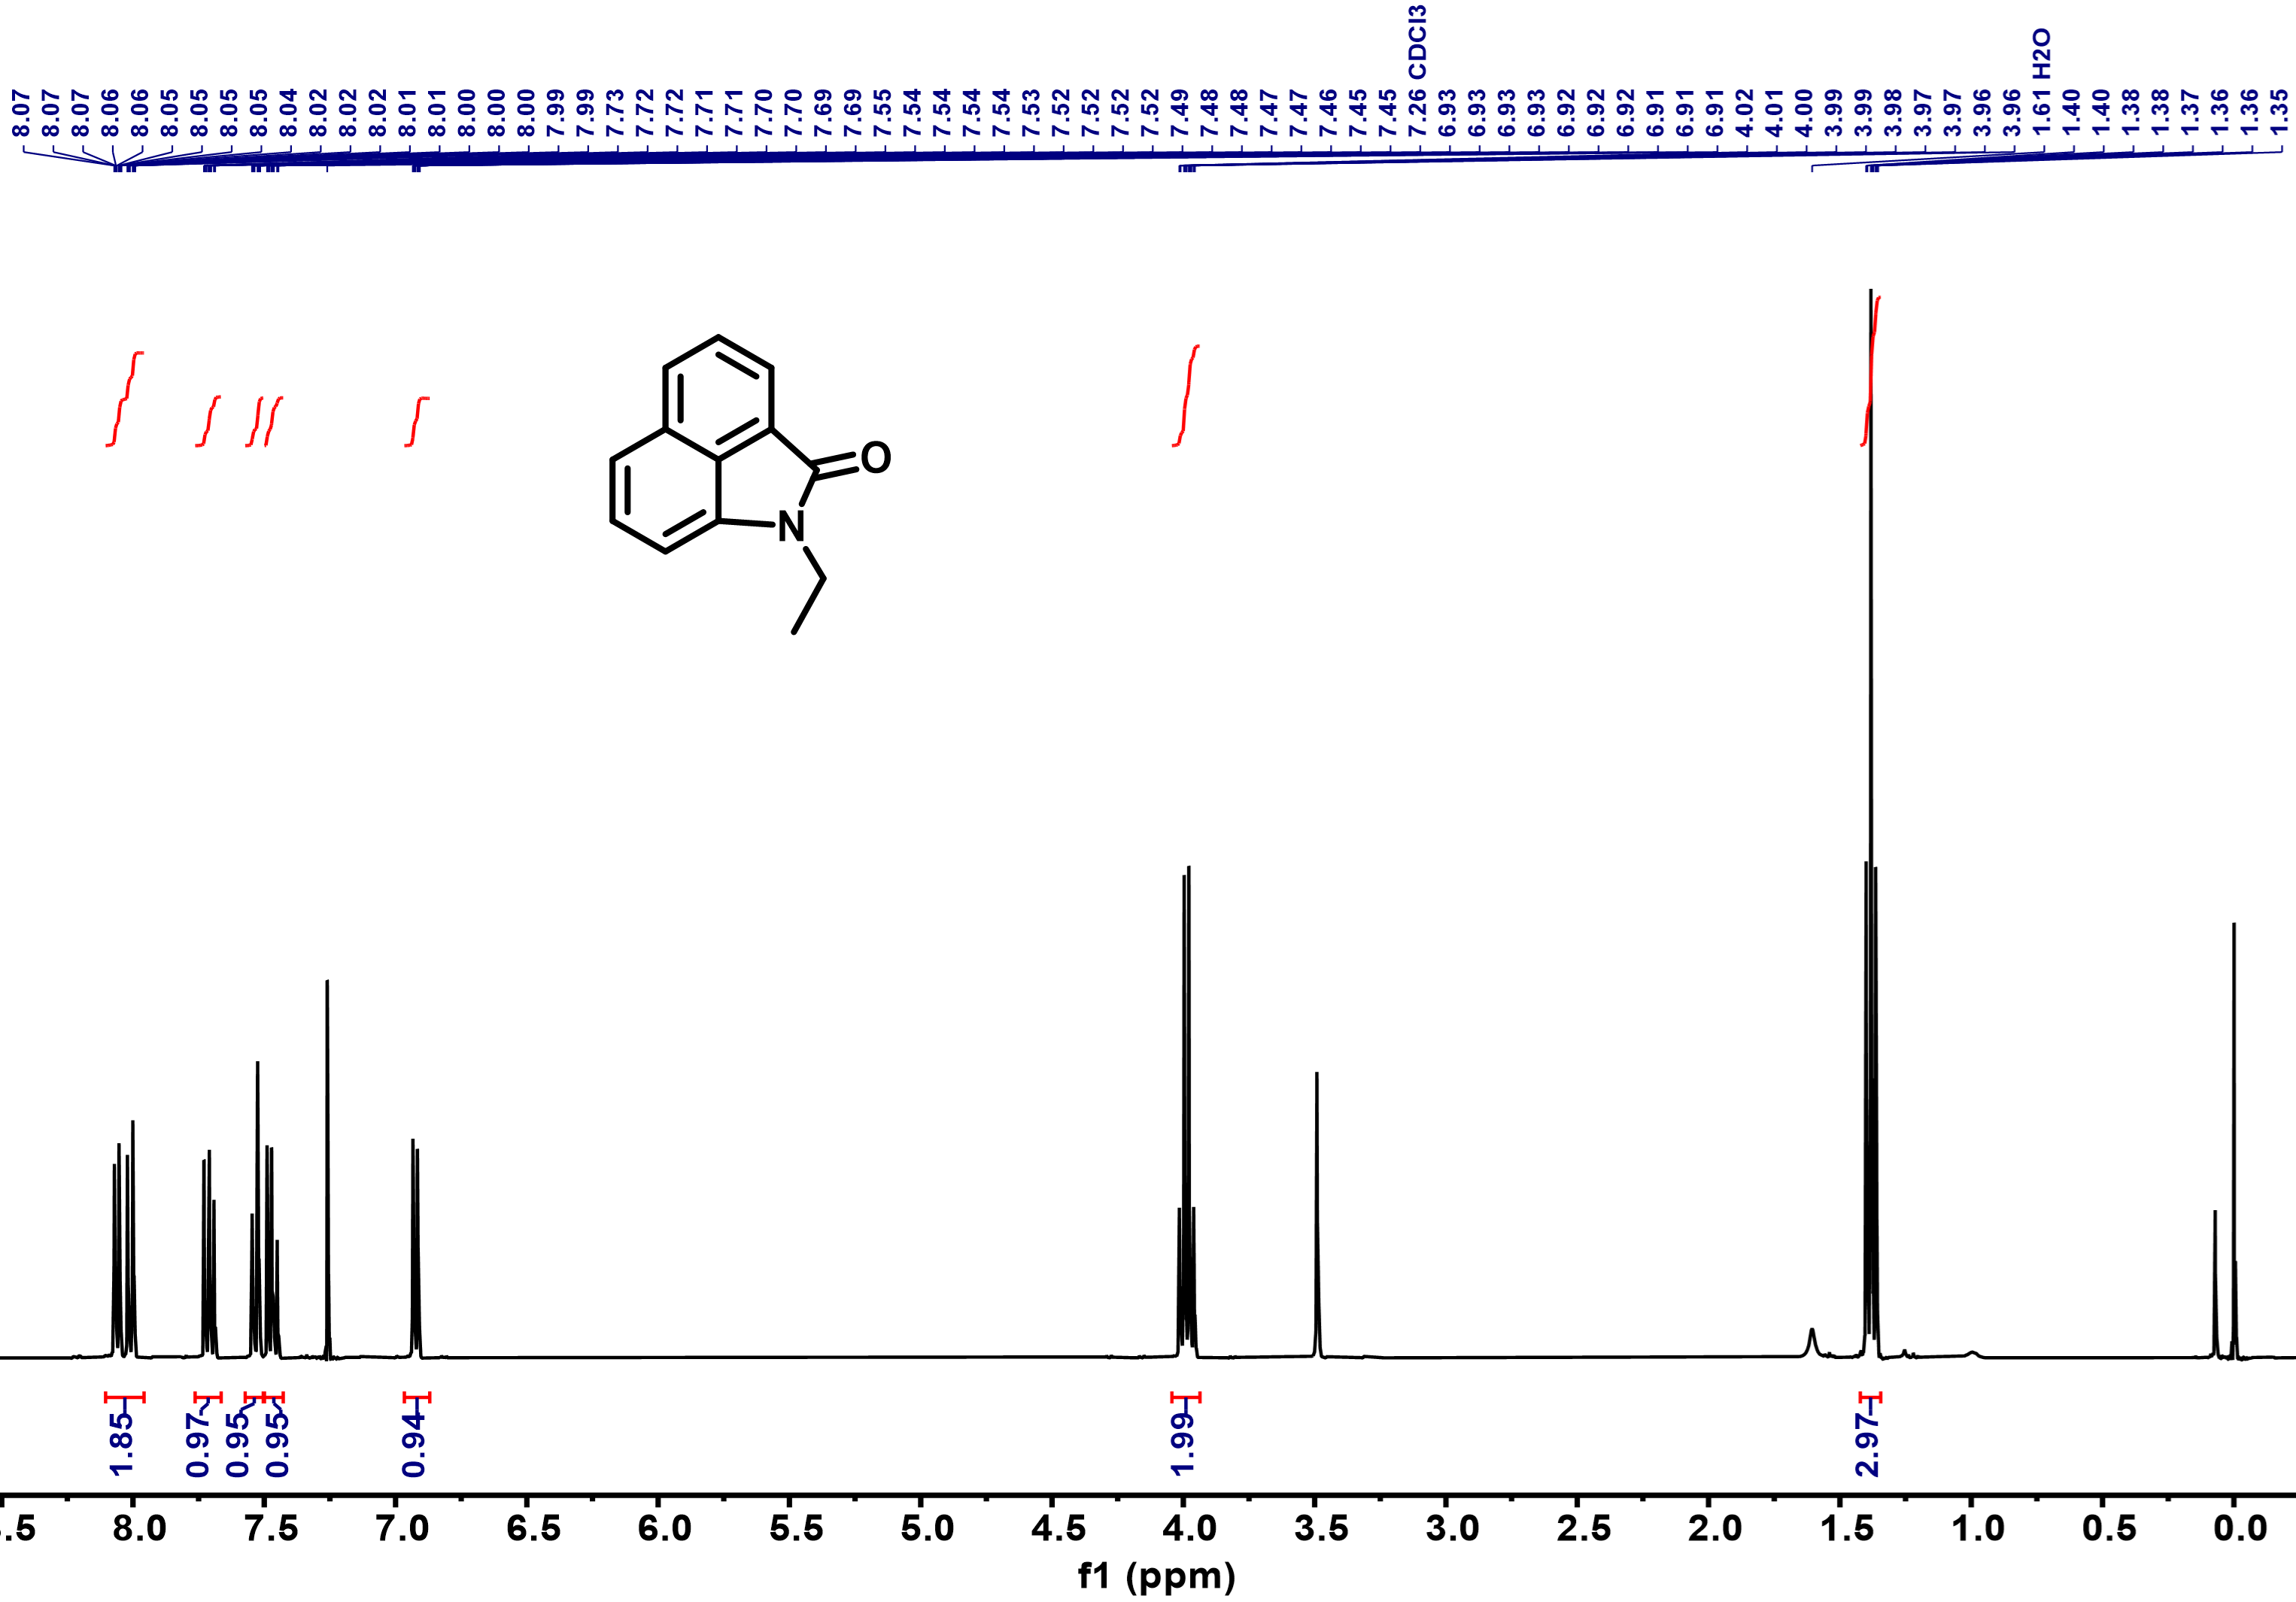
**

**Supplementary Fig 2.** The 1H NMR of compound **1**.


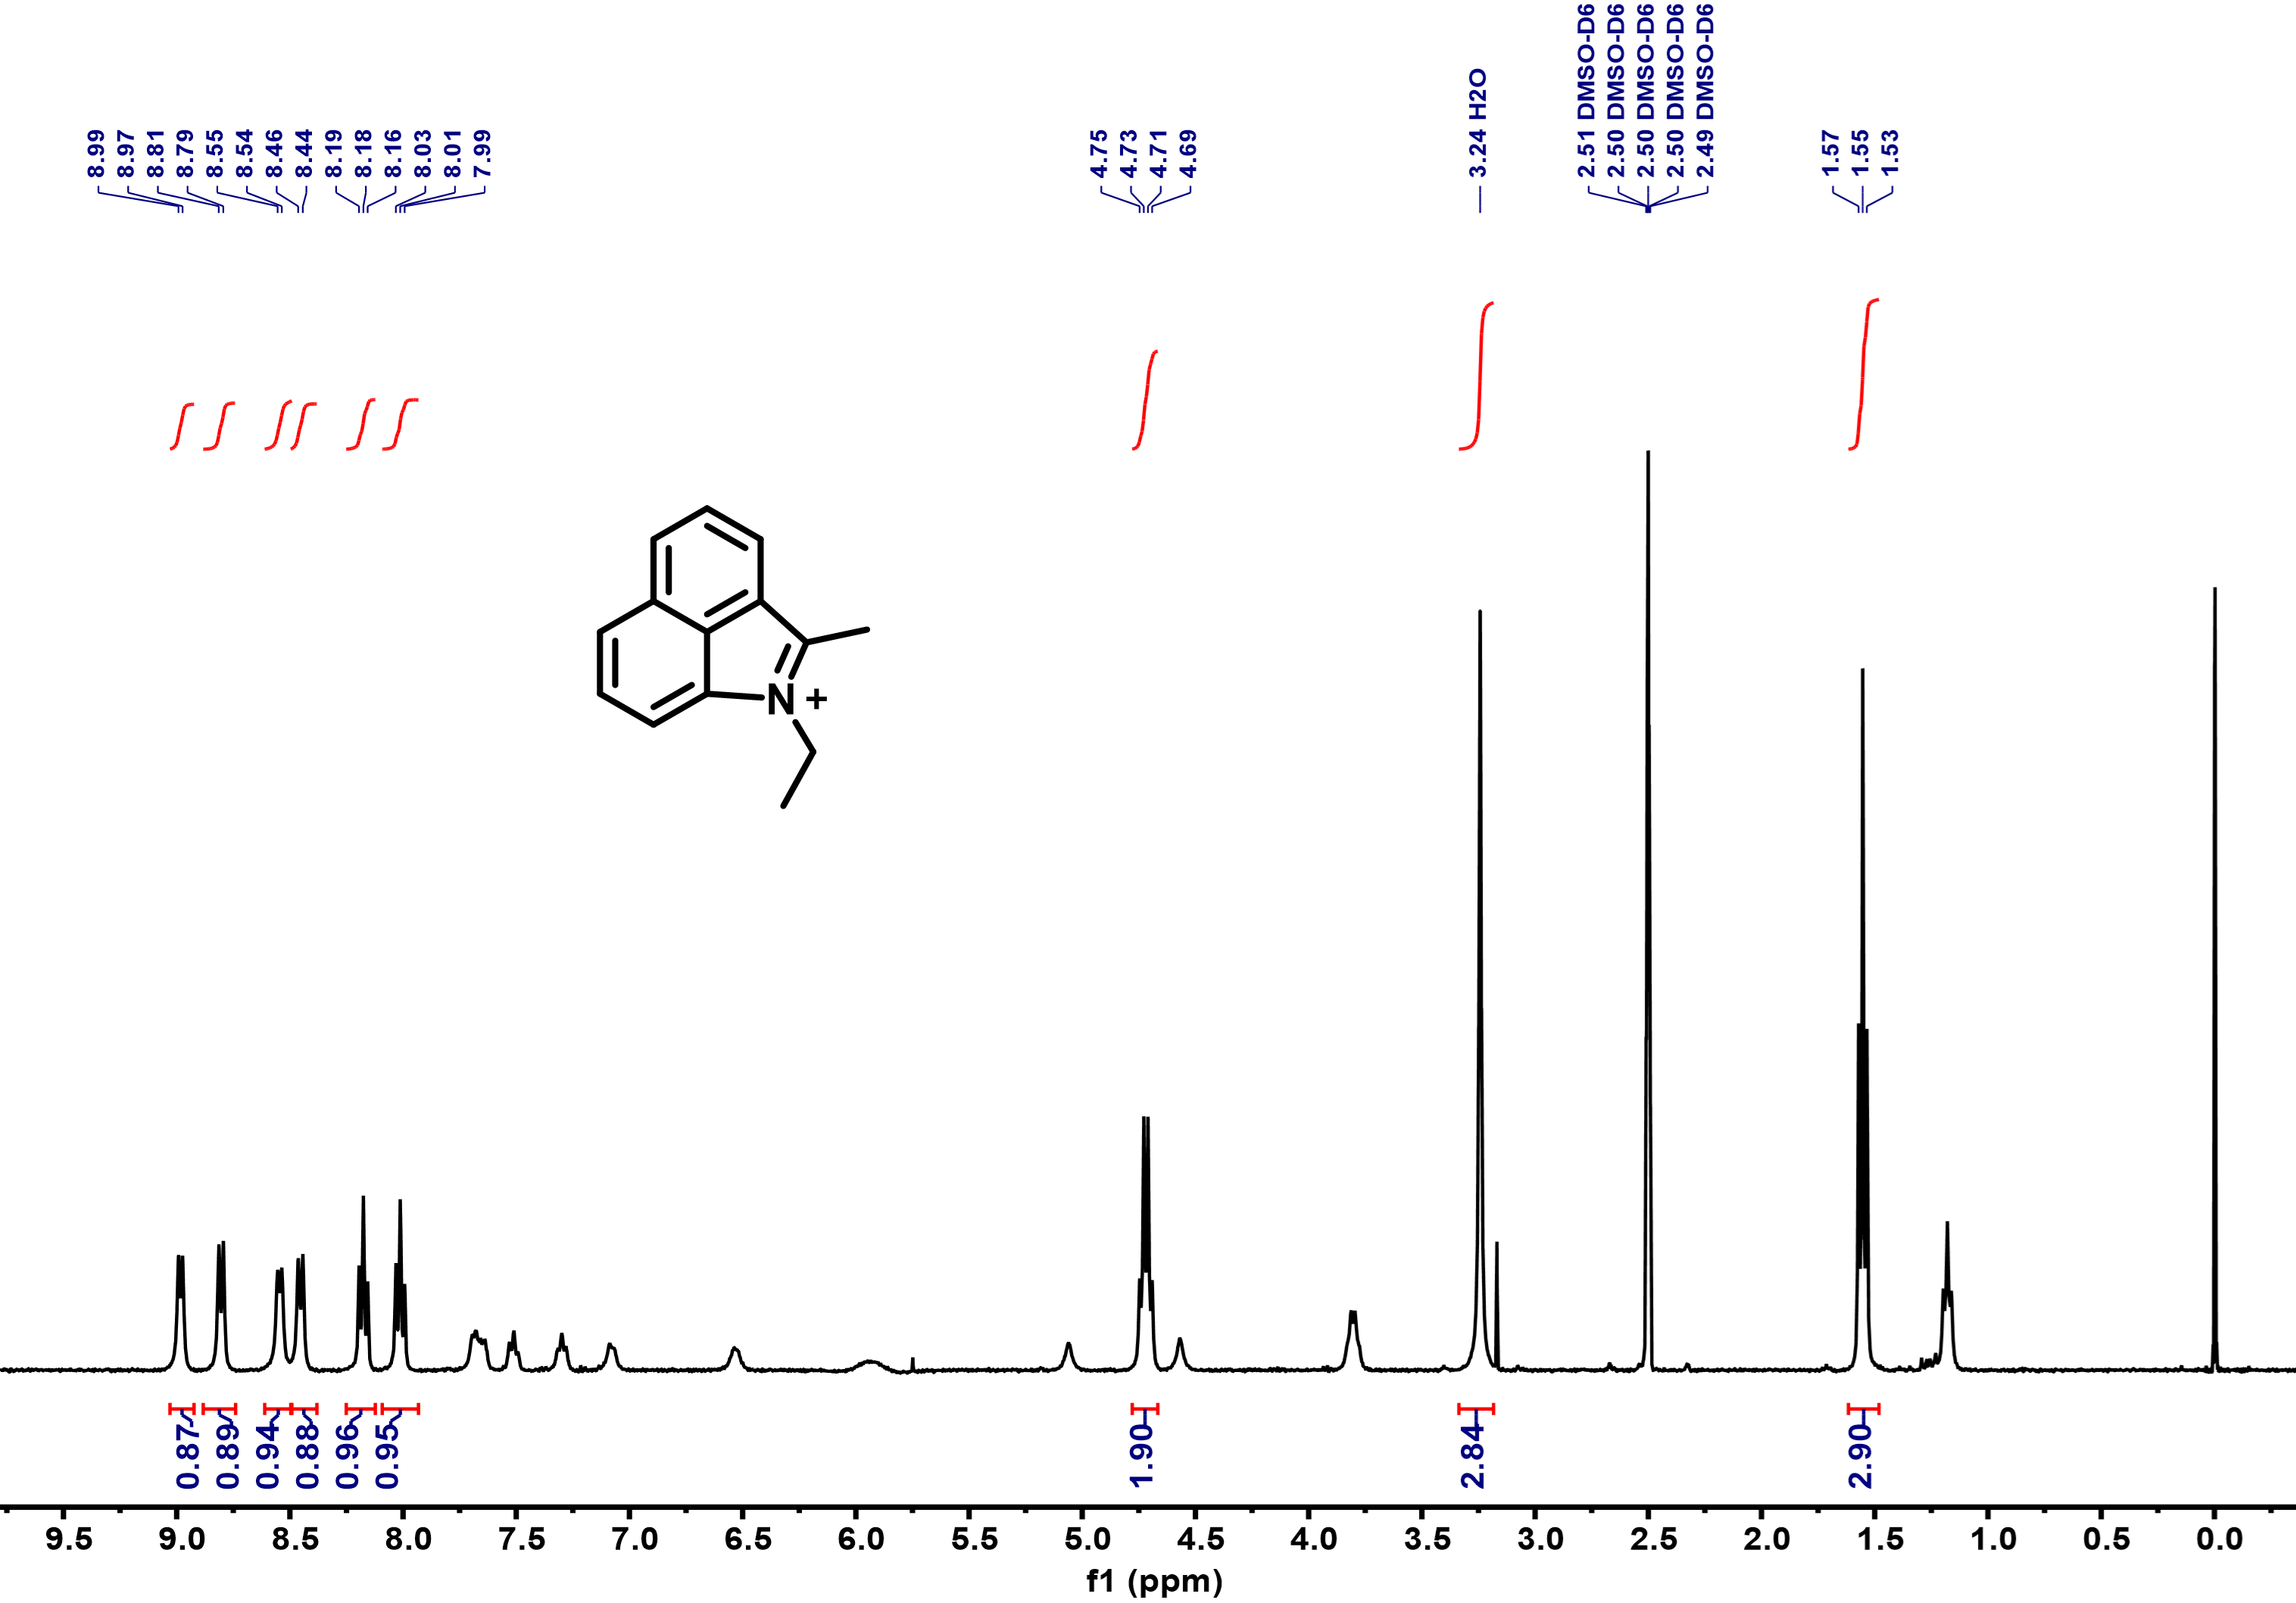


**Supplementary Fig 3.** The 1H NMR of compound **2**.


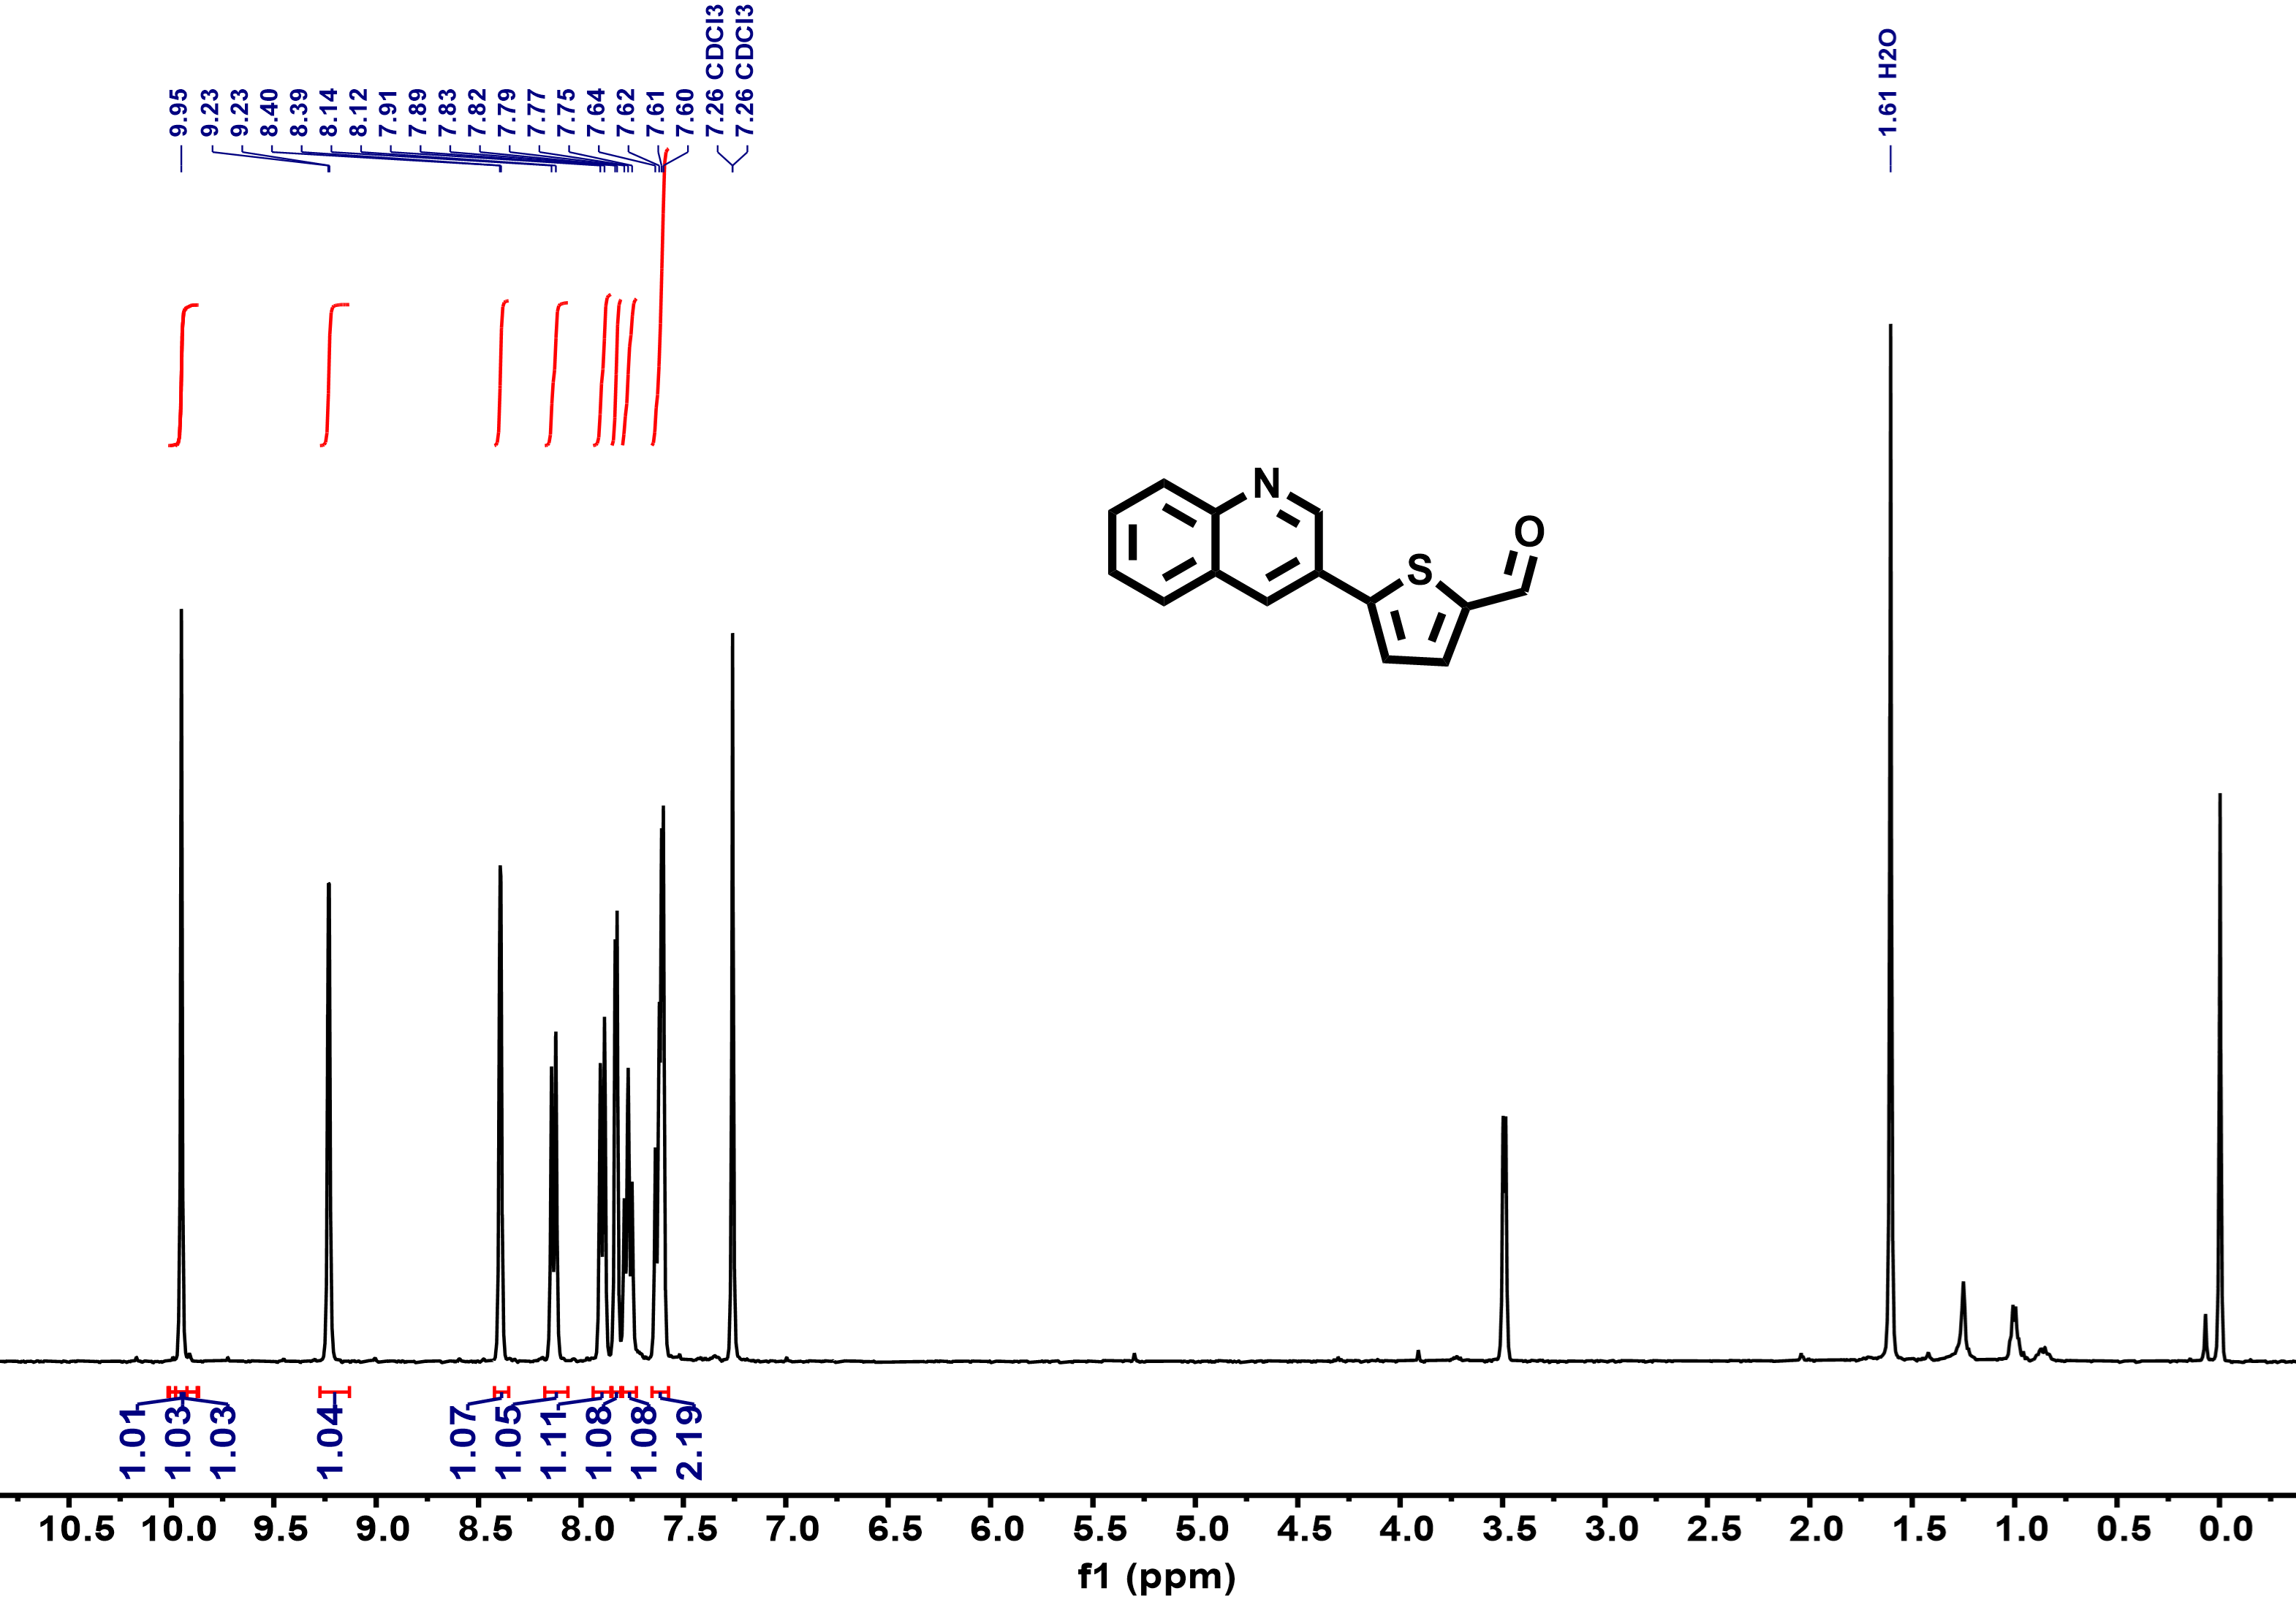


**Supplementary Fig 4.** The 1H NMR of compound **3**.


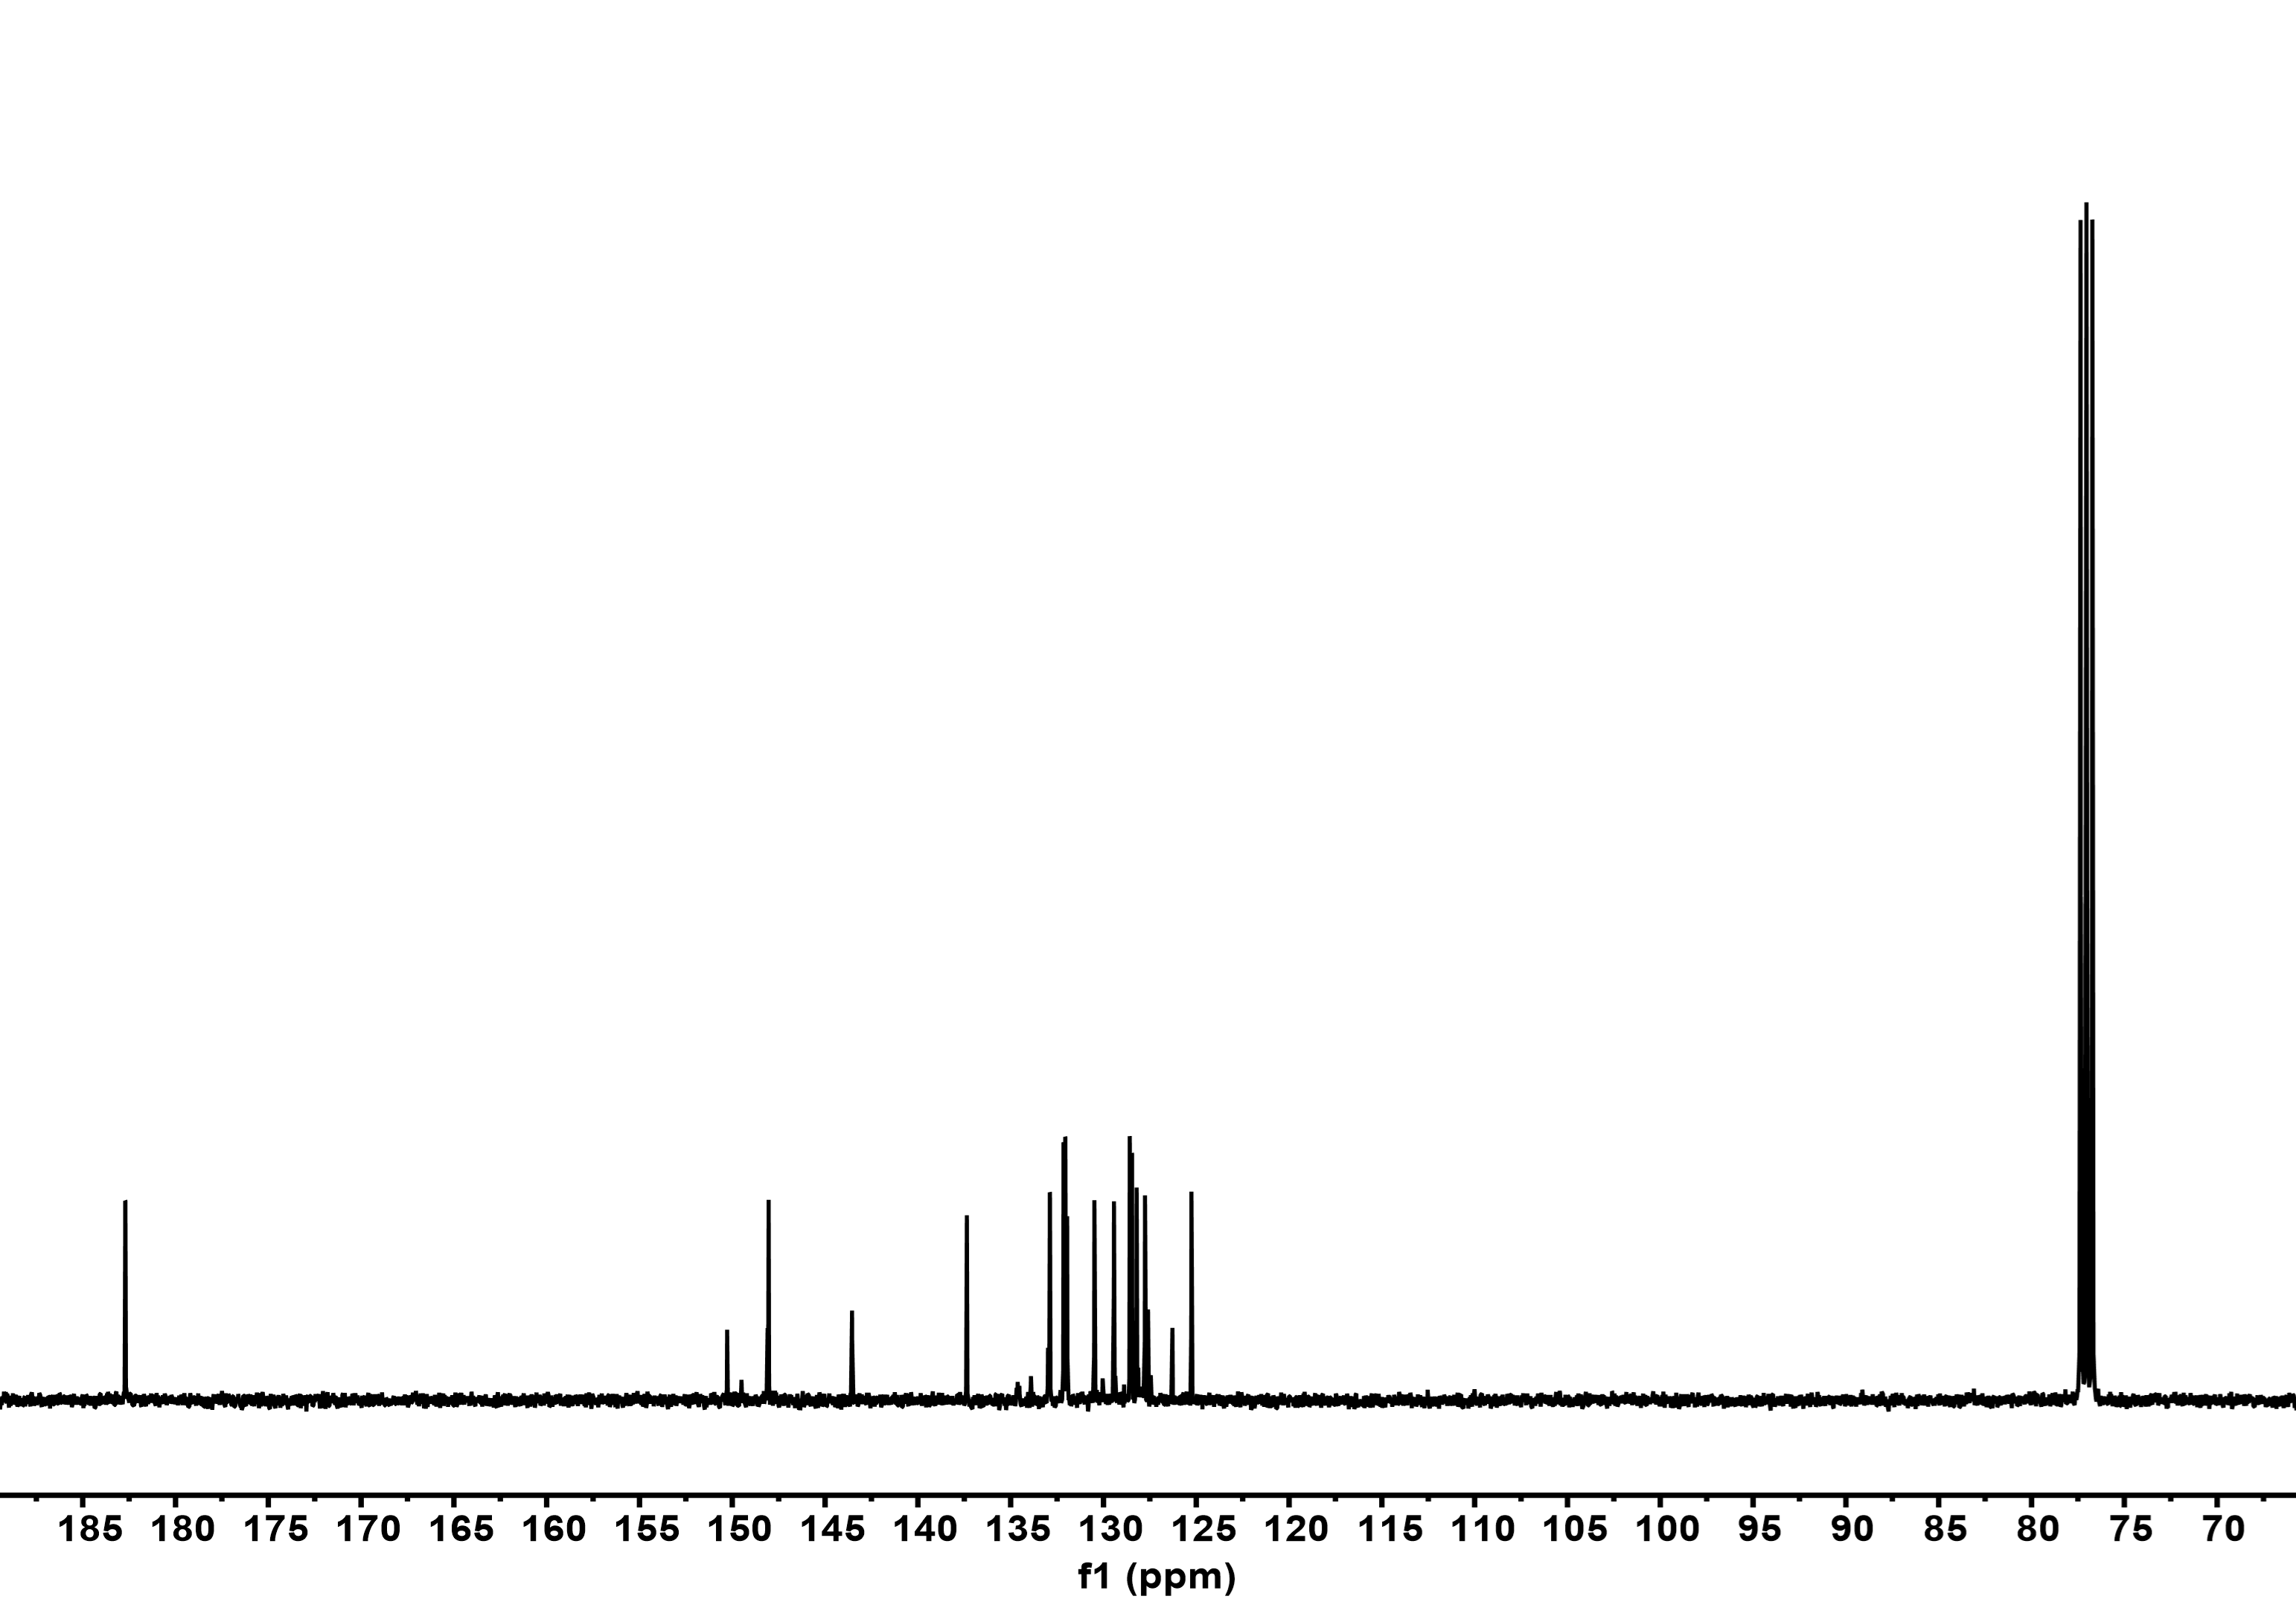


**Supplementary Fig 5.** The 13C NMR of compound **3**.


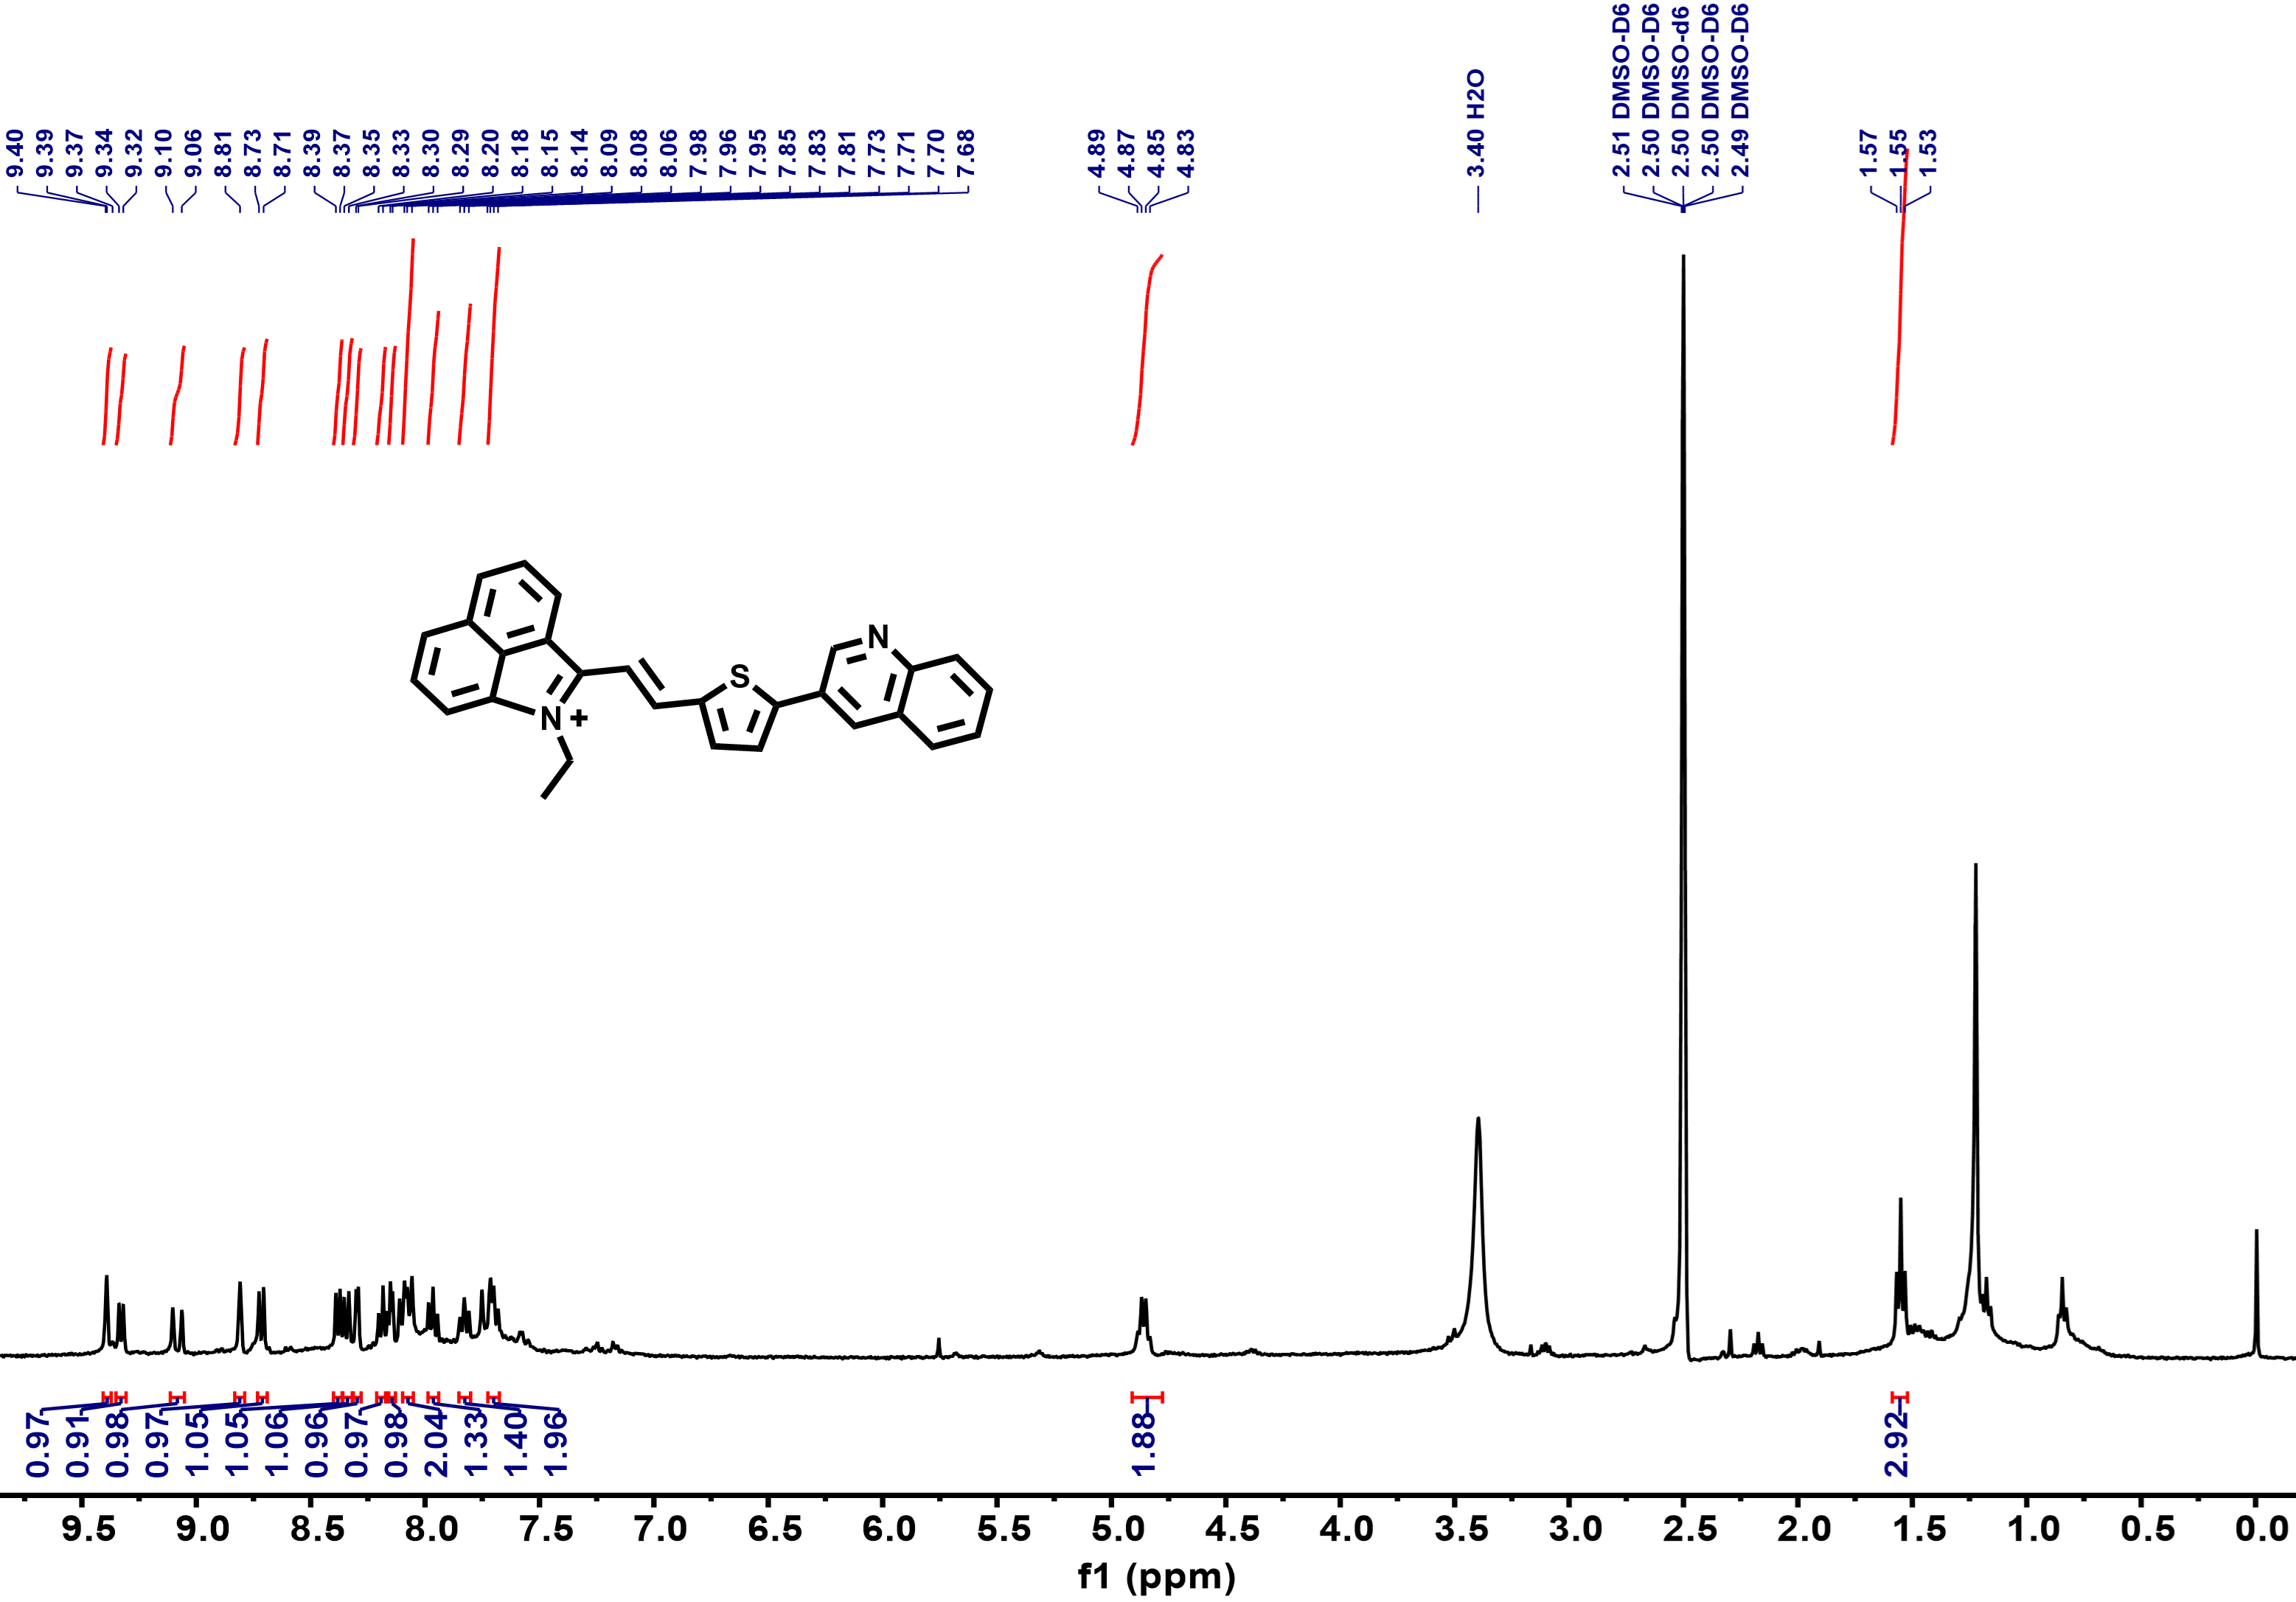


**Supplementary Fig 6.** The 1H NMR of compound **4**.


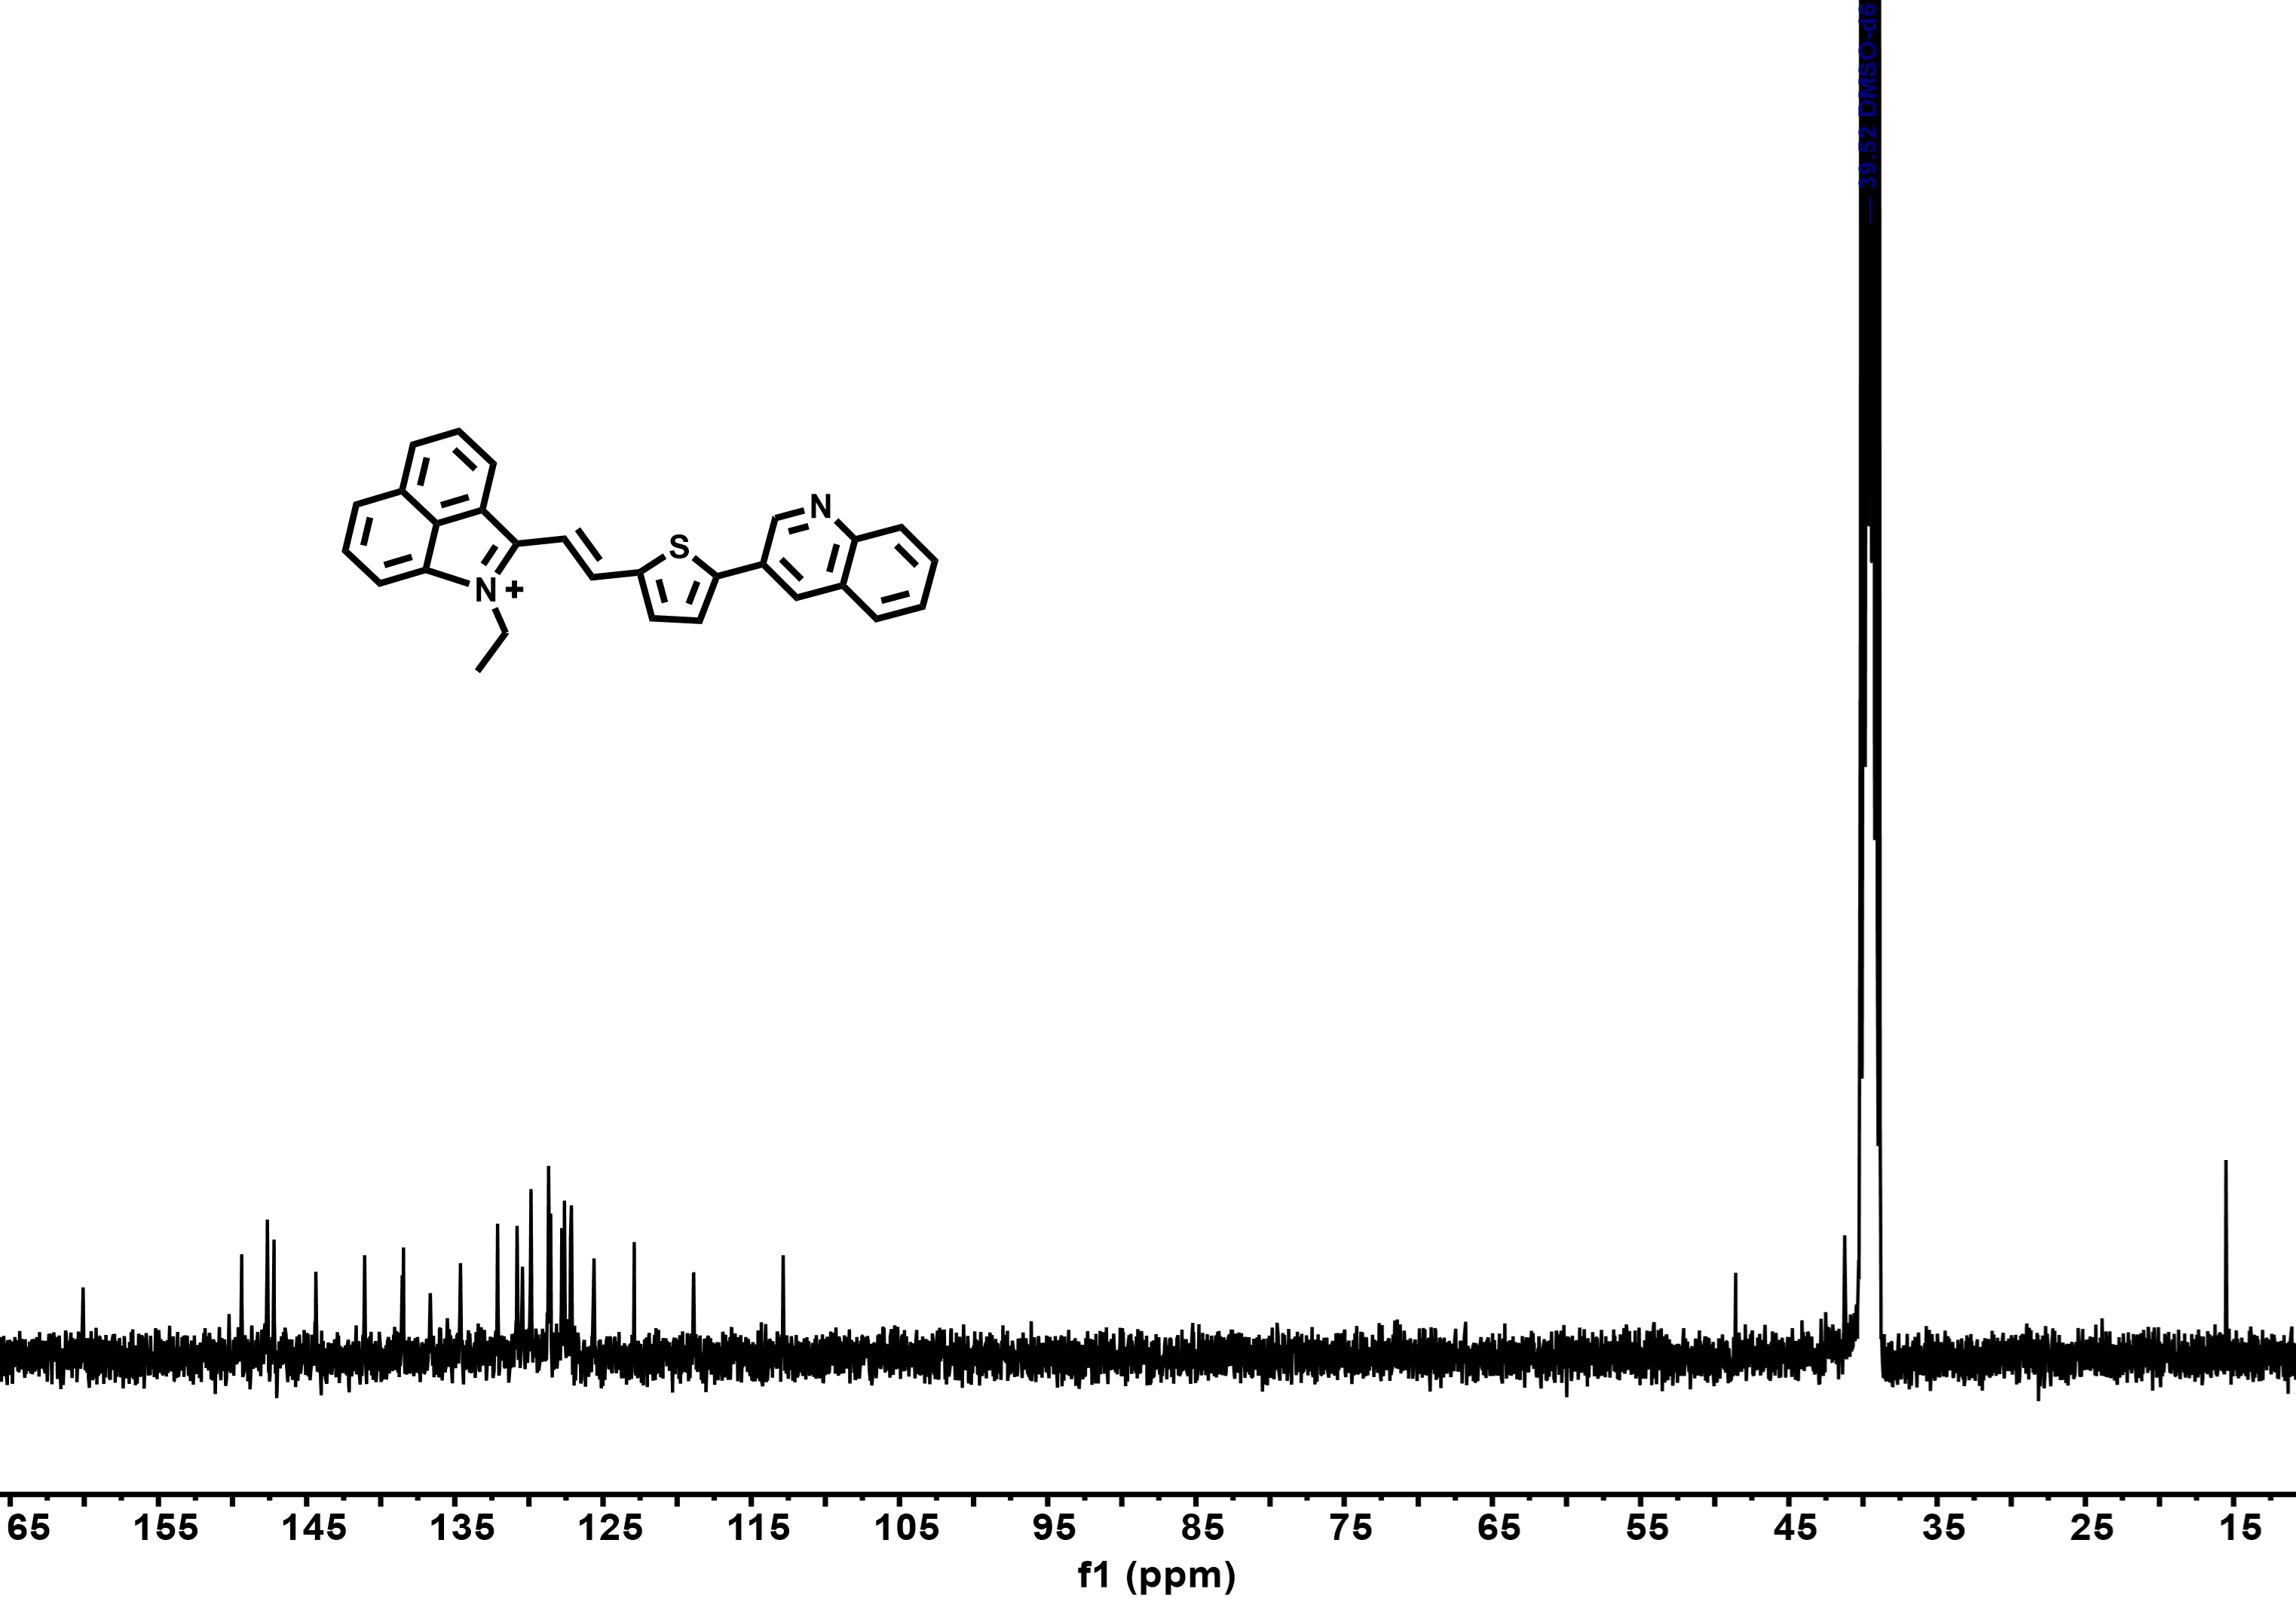


**Supplementary Fig 7.** The 13C NMR of compound **4**.


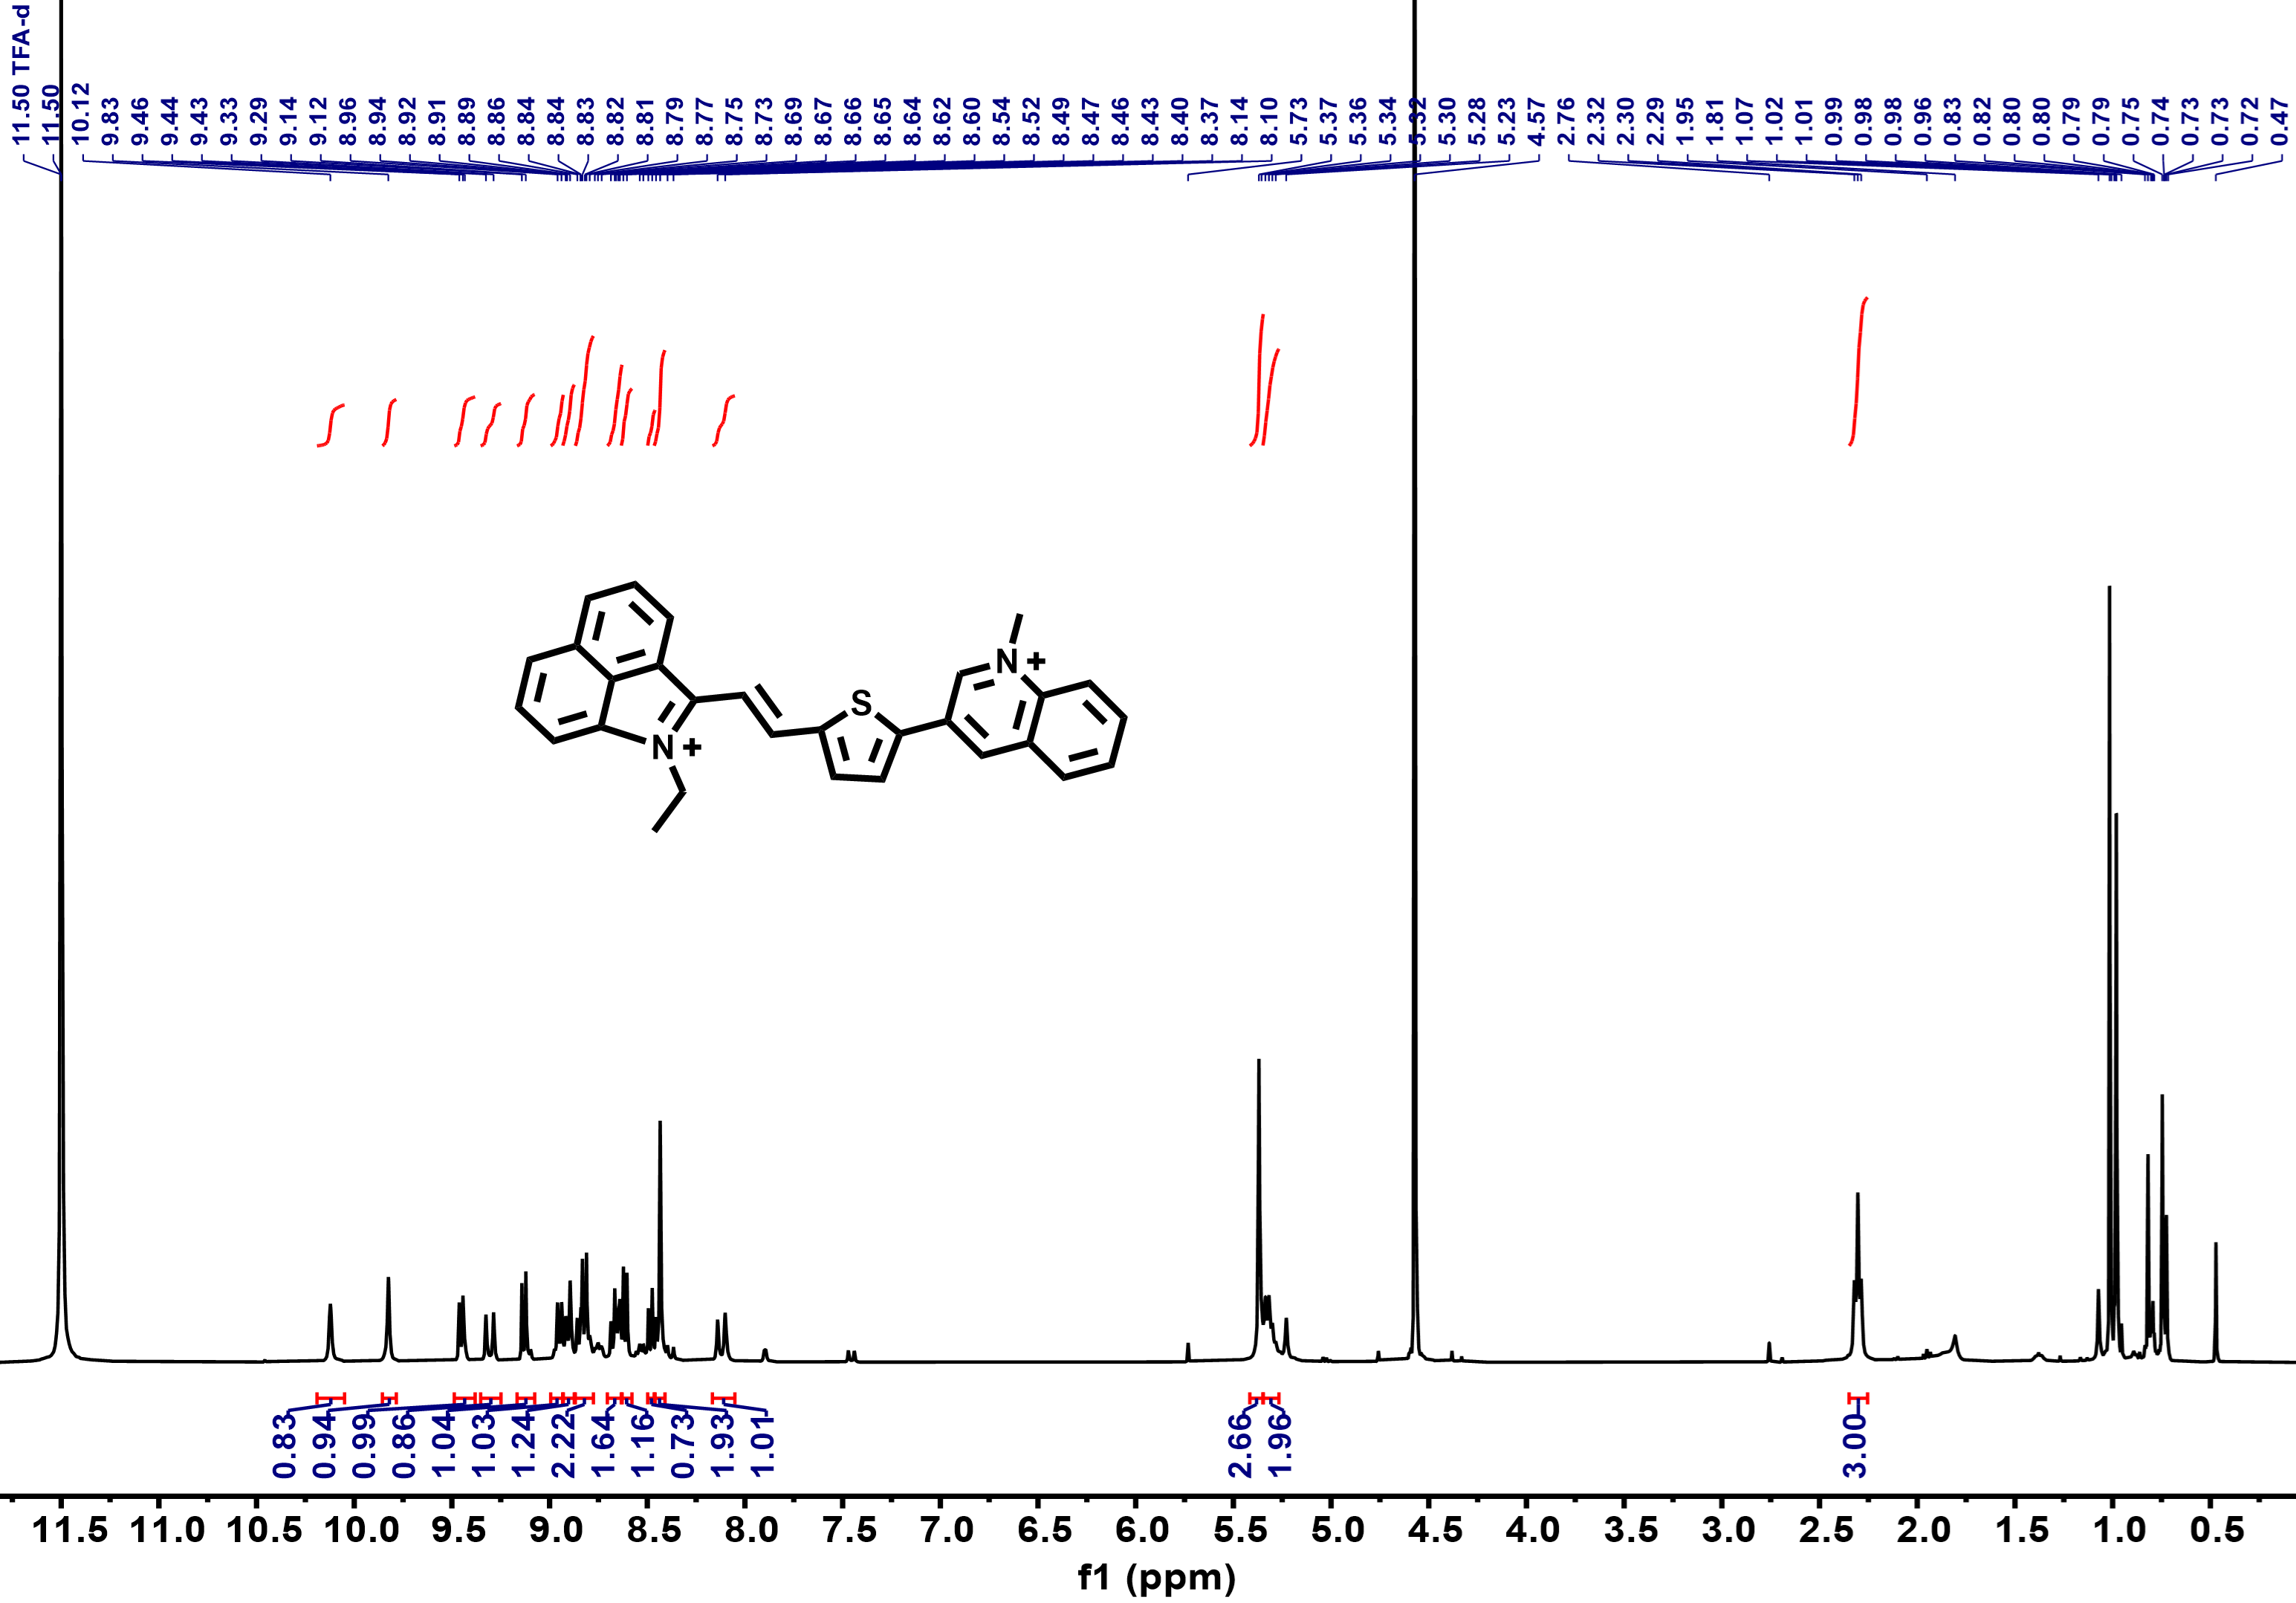


**Supplementary Fig 8.** The 1H NMR of **Cy-N**.


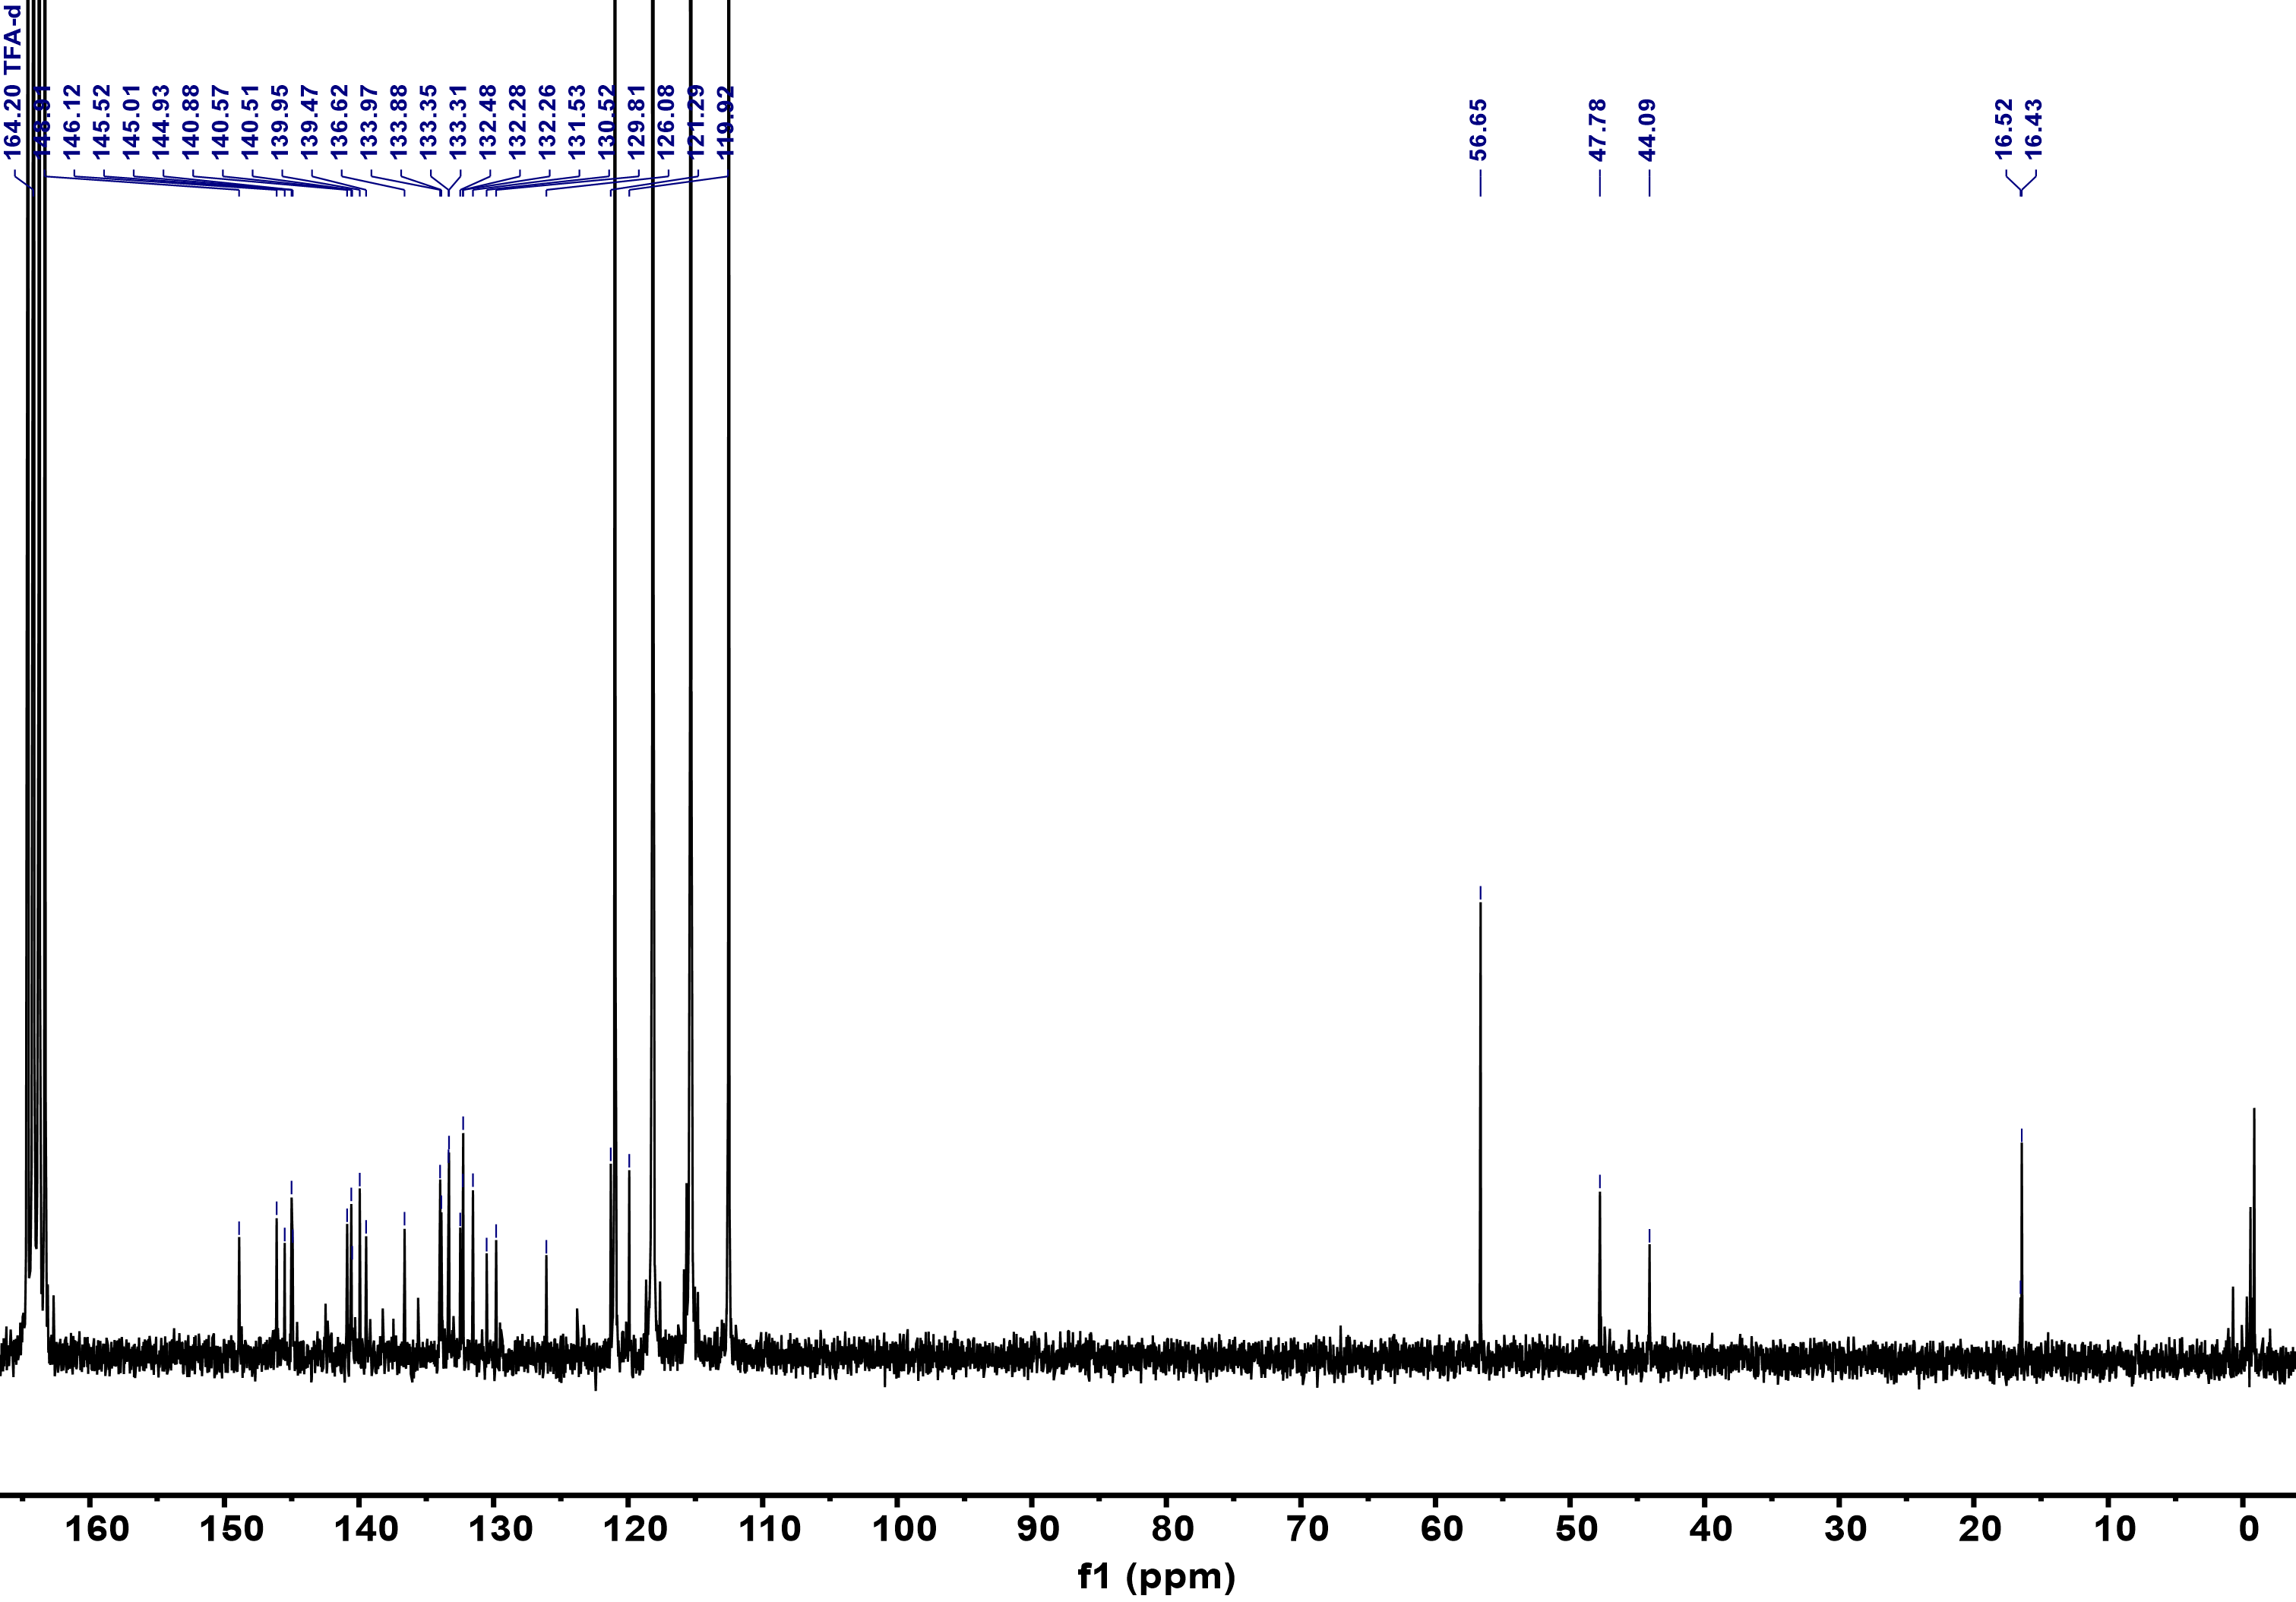


**Supplementary Fig 9.** The 13C NMR of **Cy-N**.


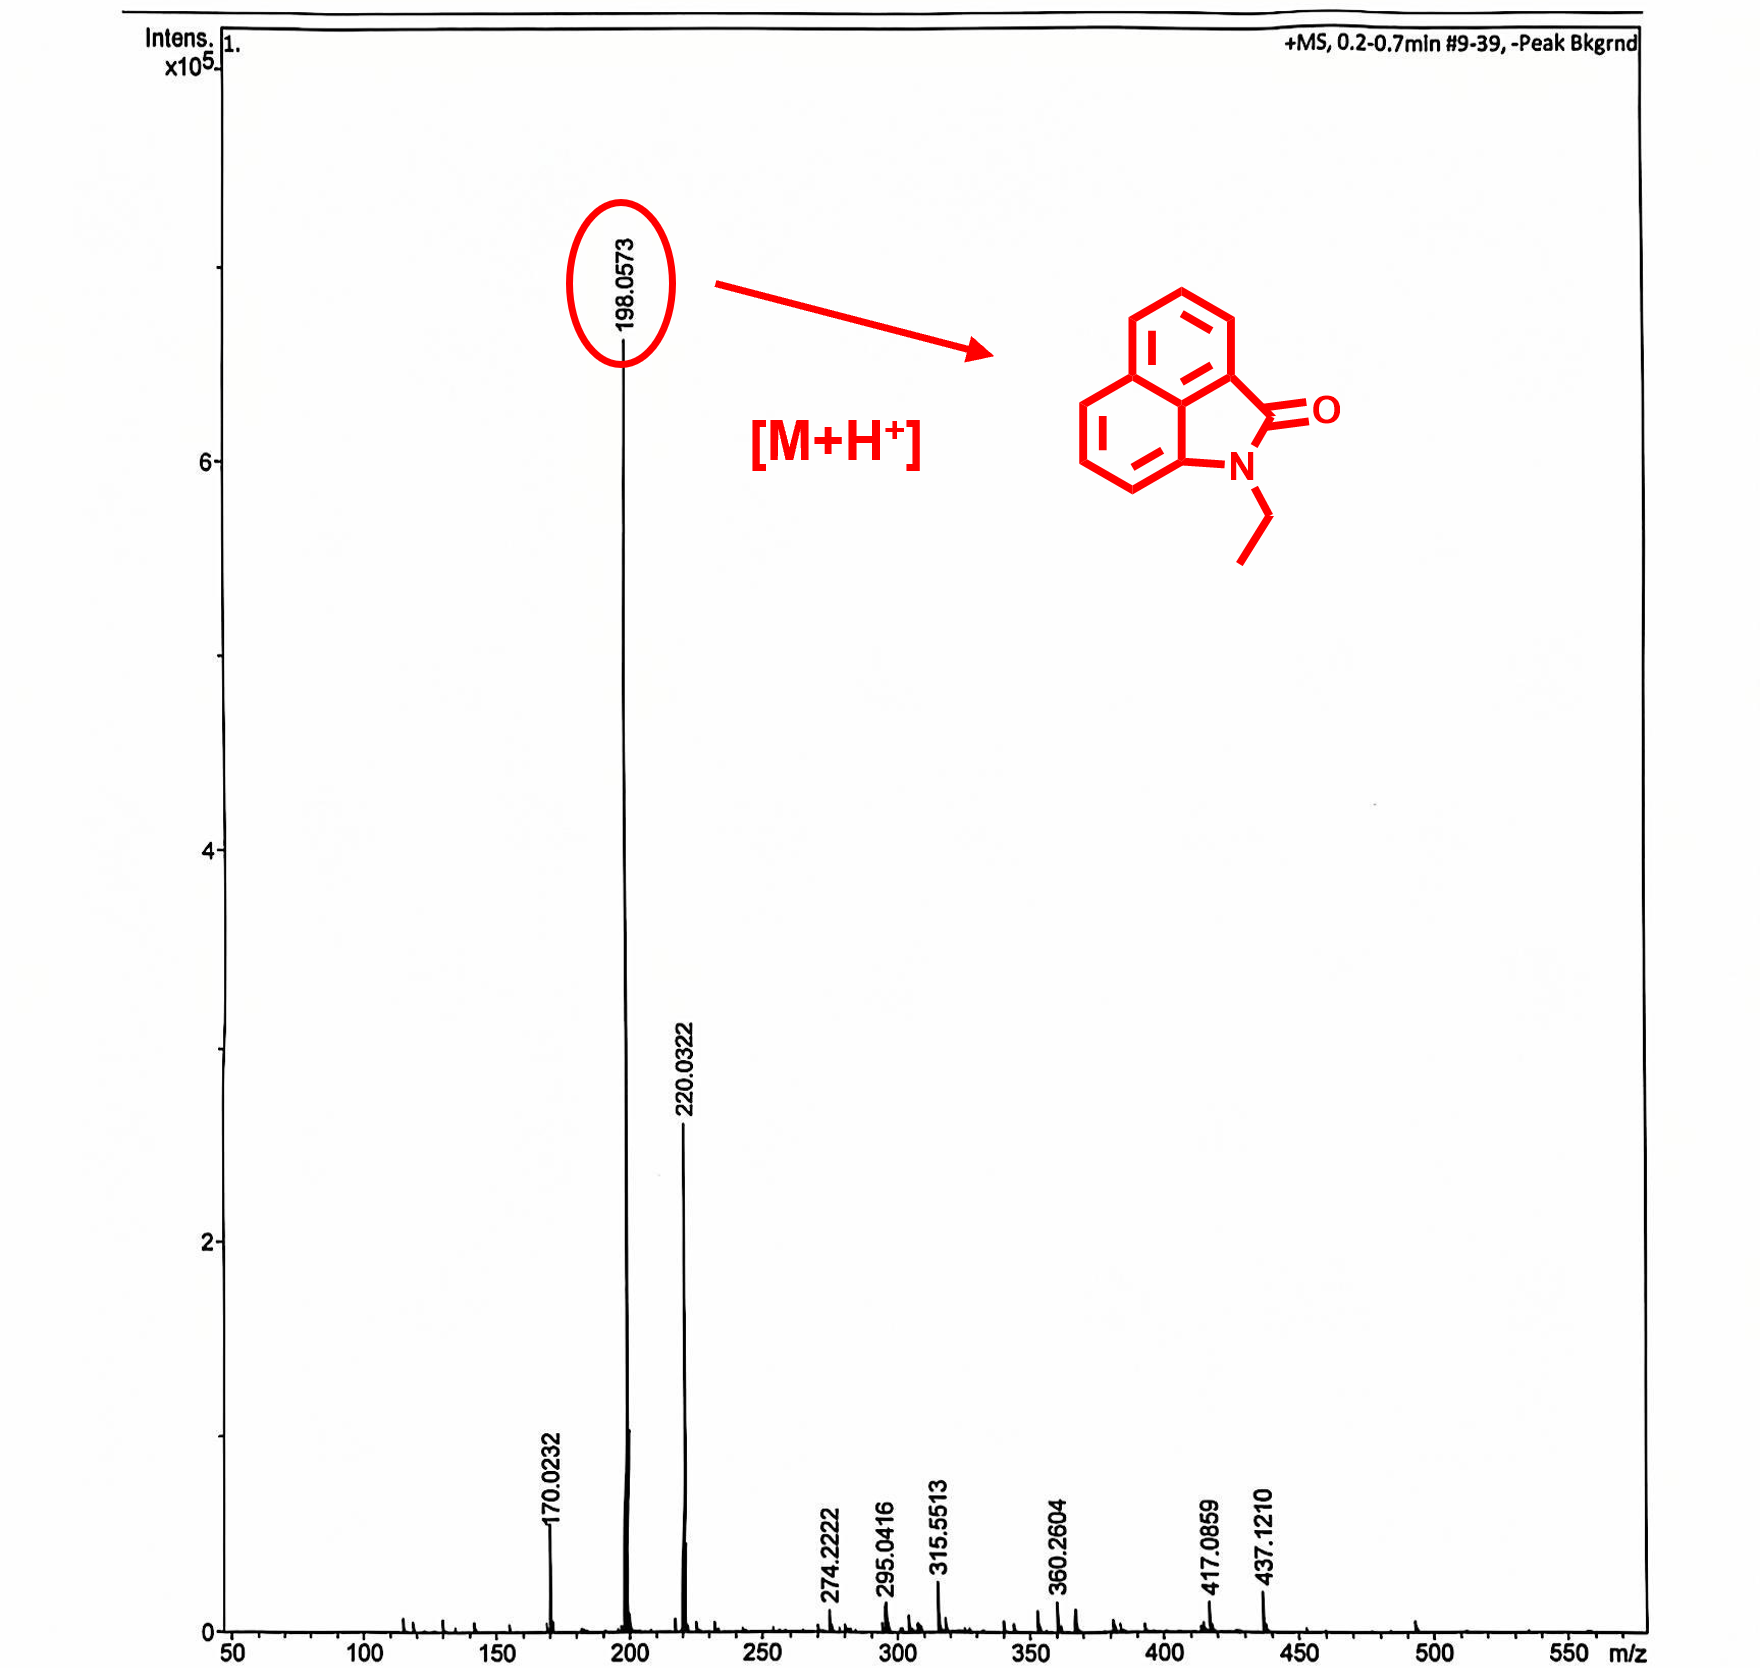


**Supplementary Fig 10.** The MS of compound **1**.


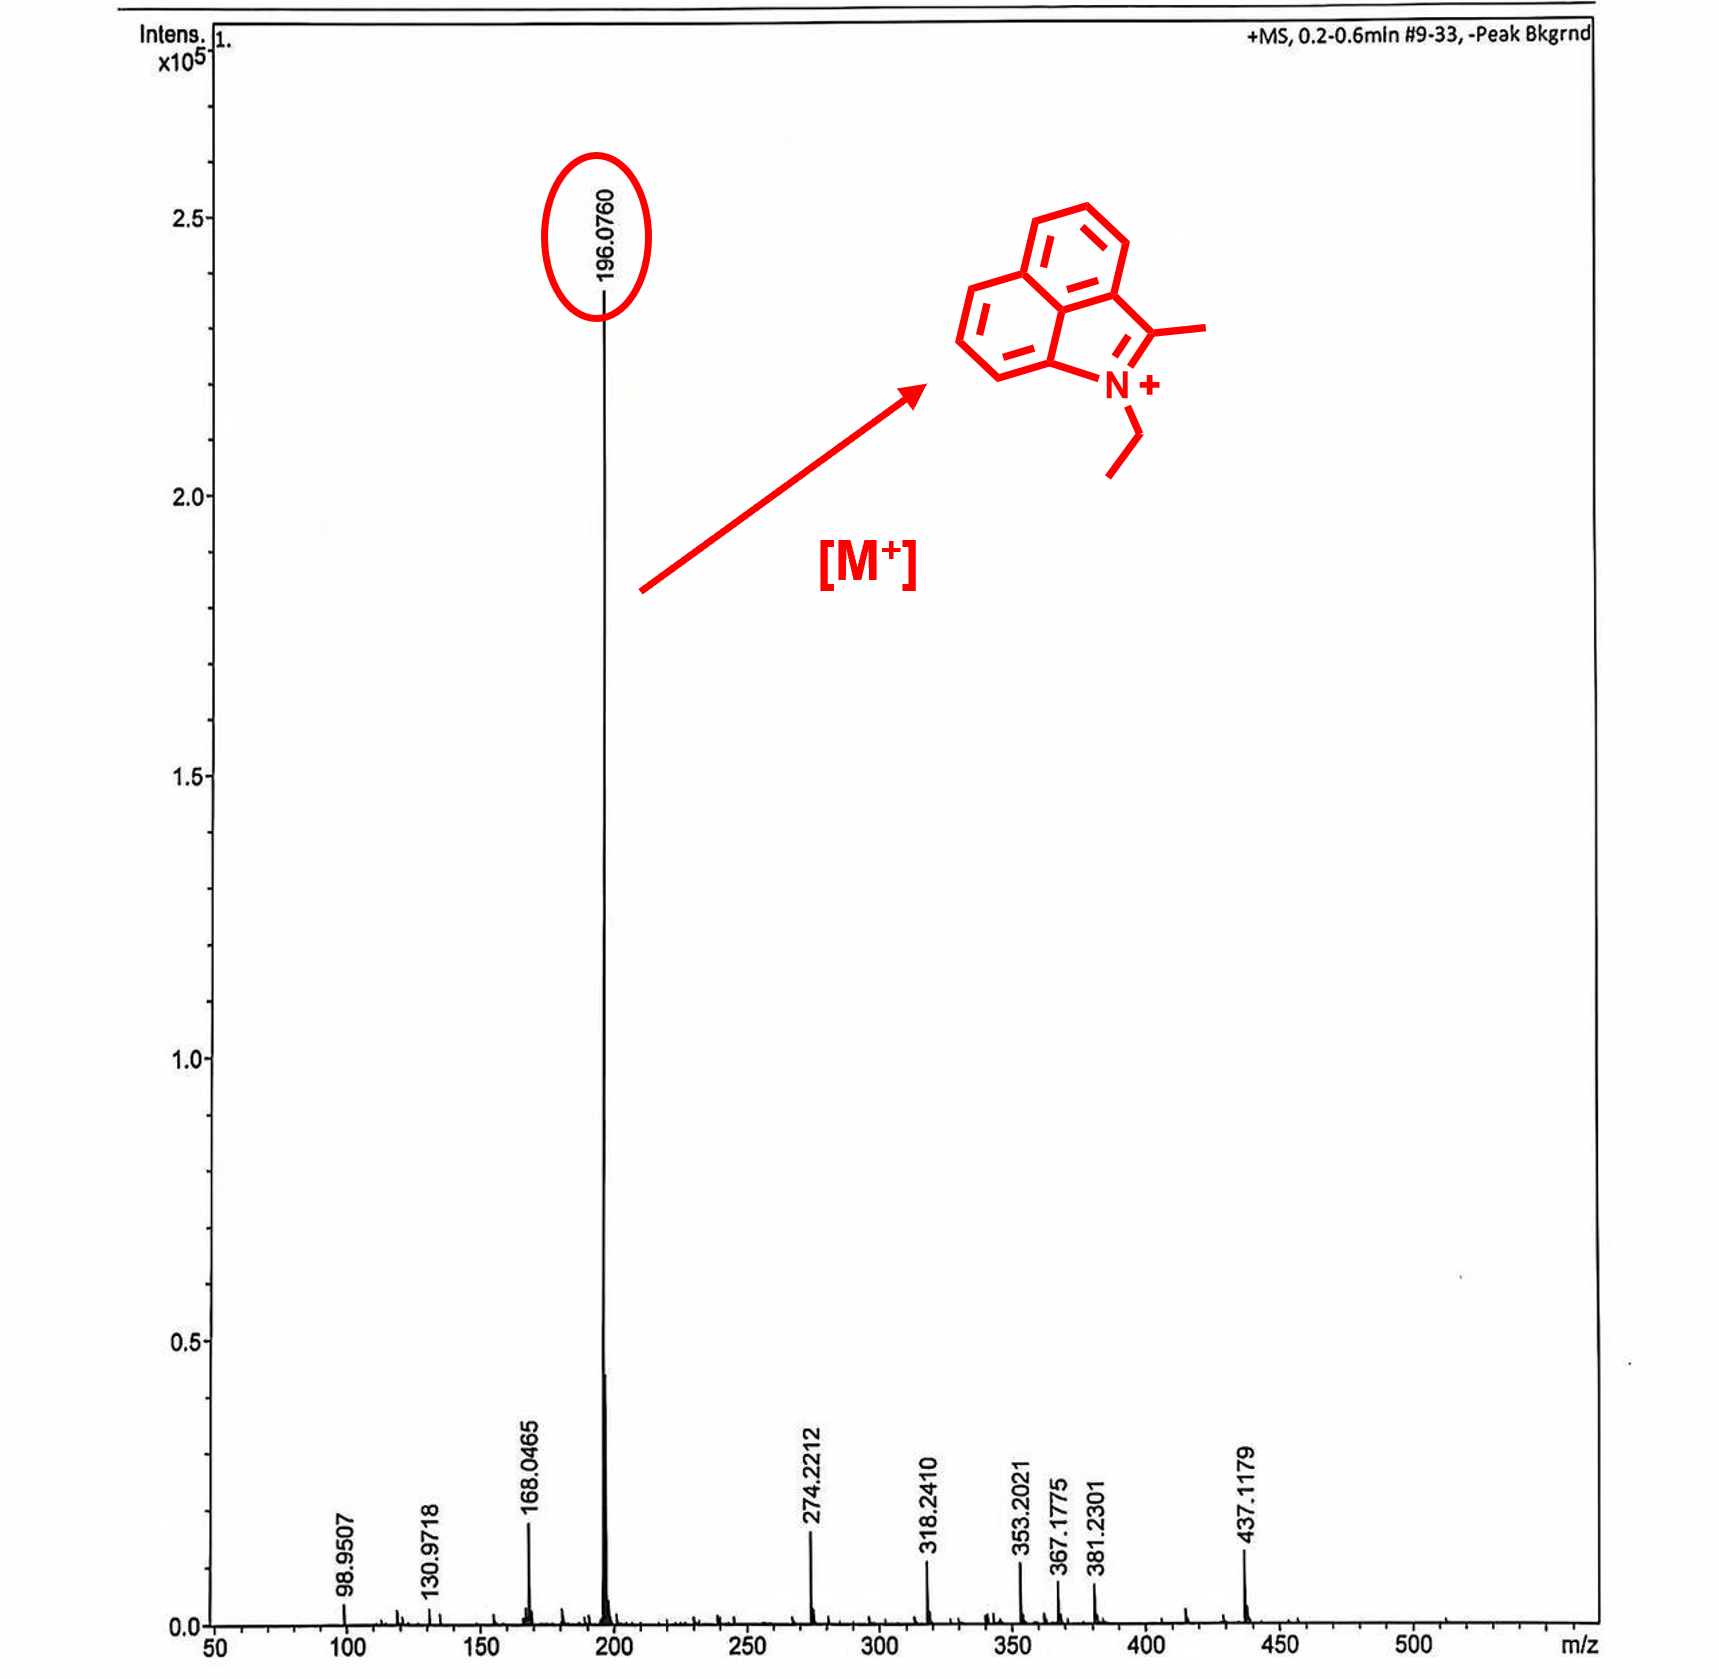


**Supplementary Fig 11.** The MS of compound **2**.


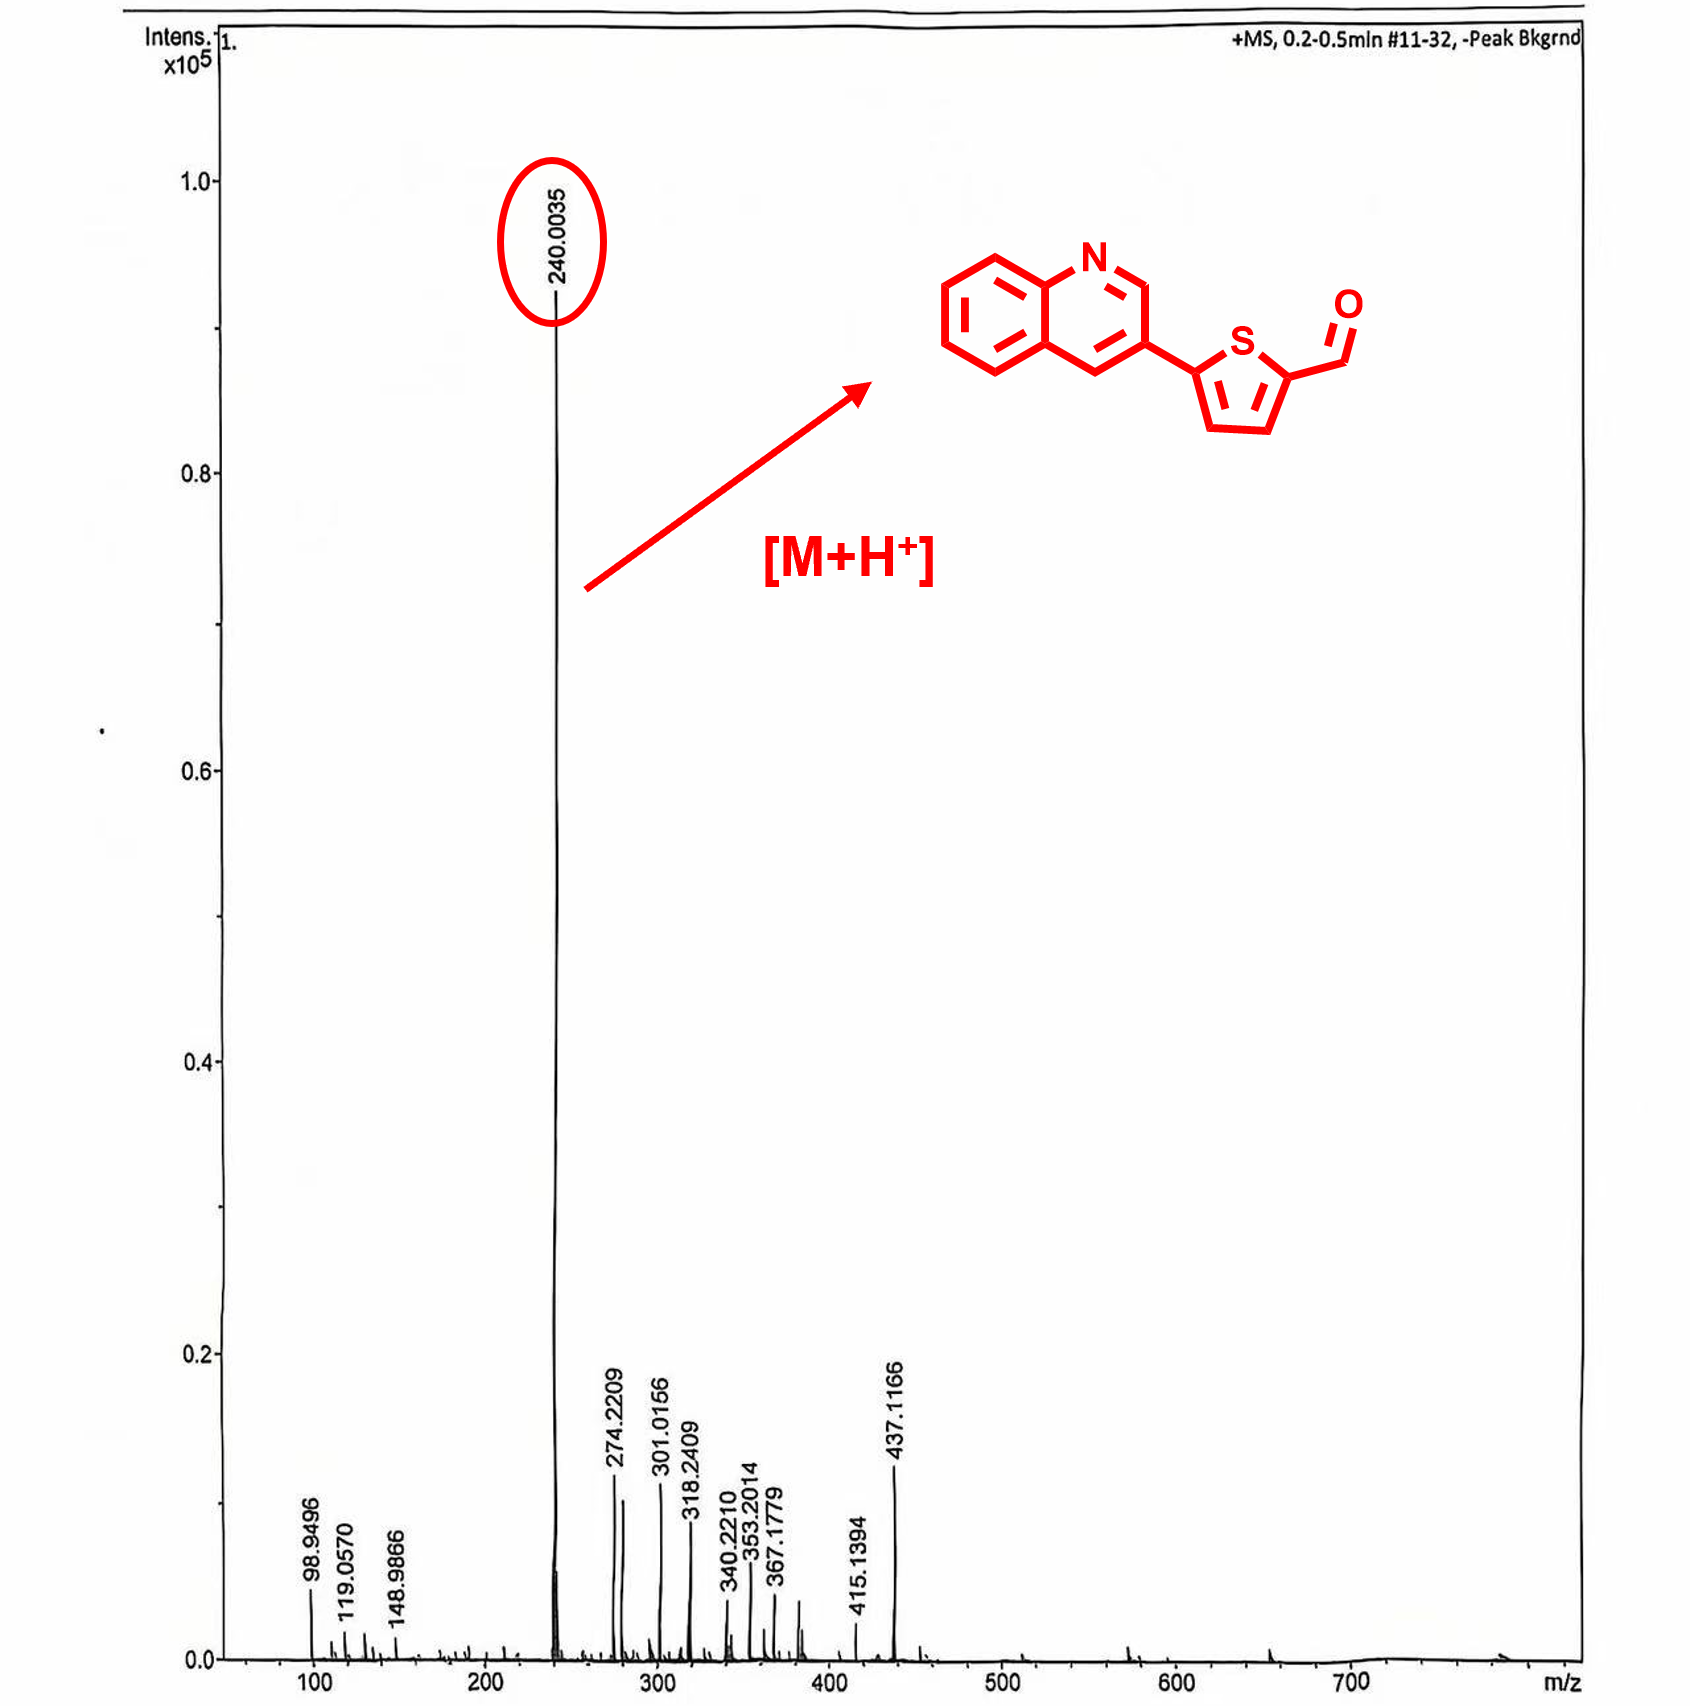


**Supplementary Fig 12.** The MS of compound **3**.


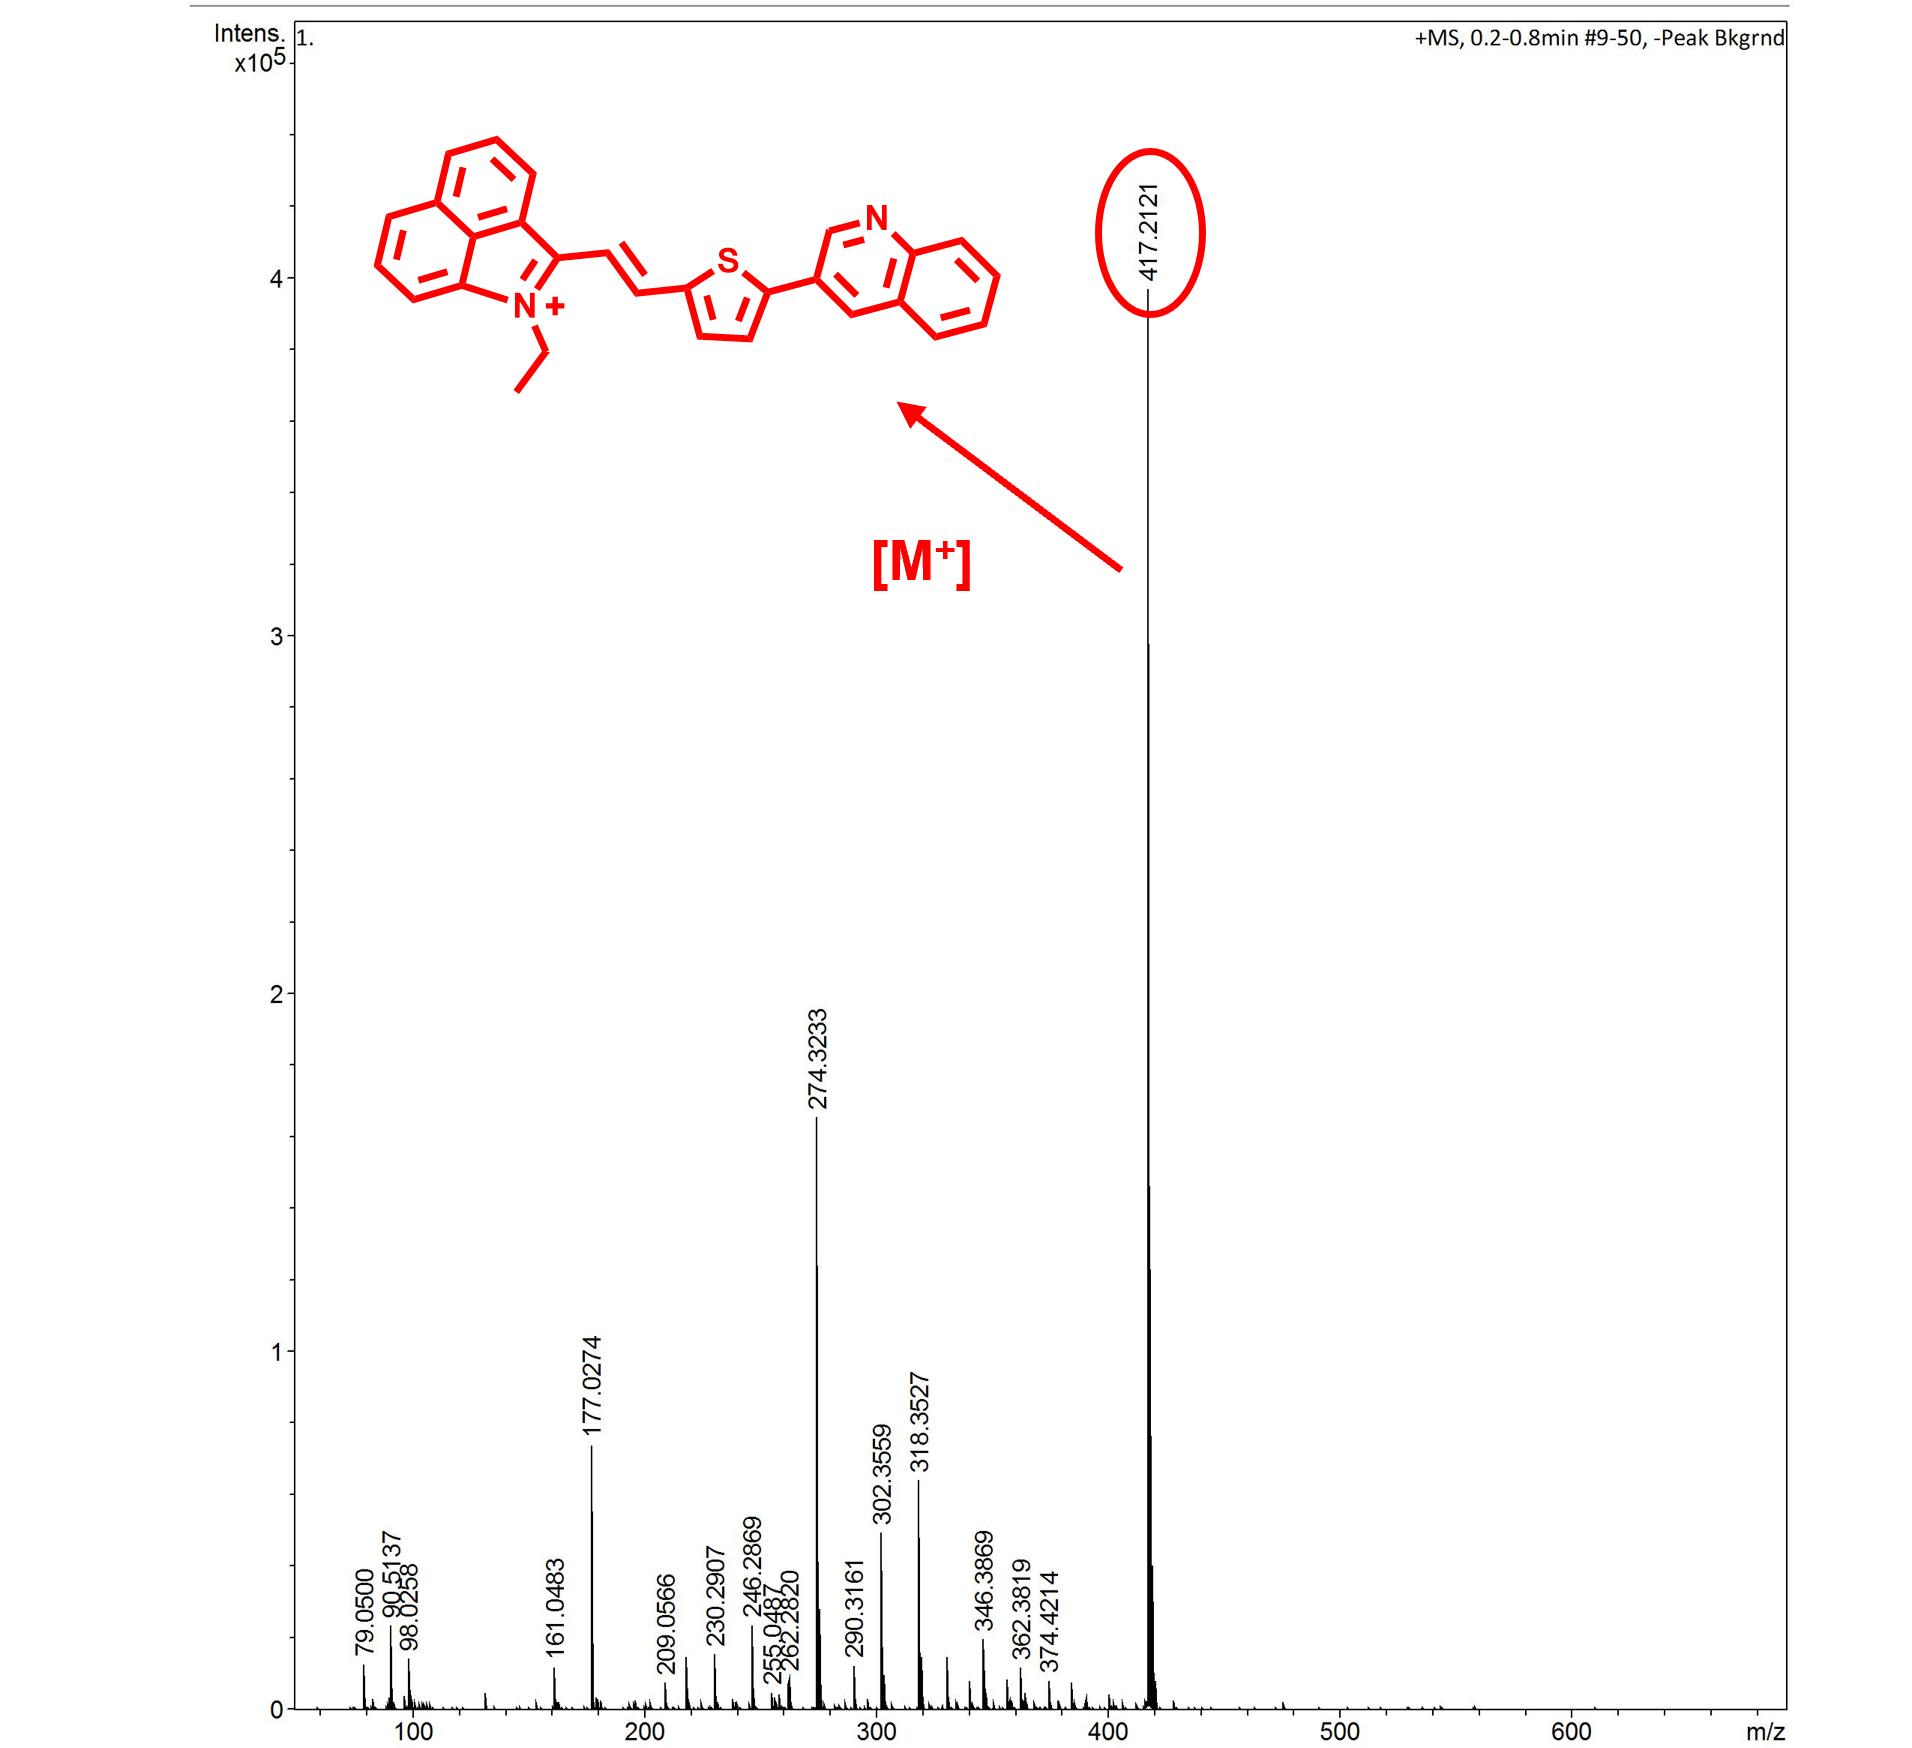


**Supplementary Fig 13.** The MS of compound **4**.


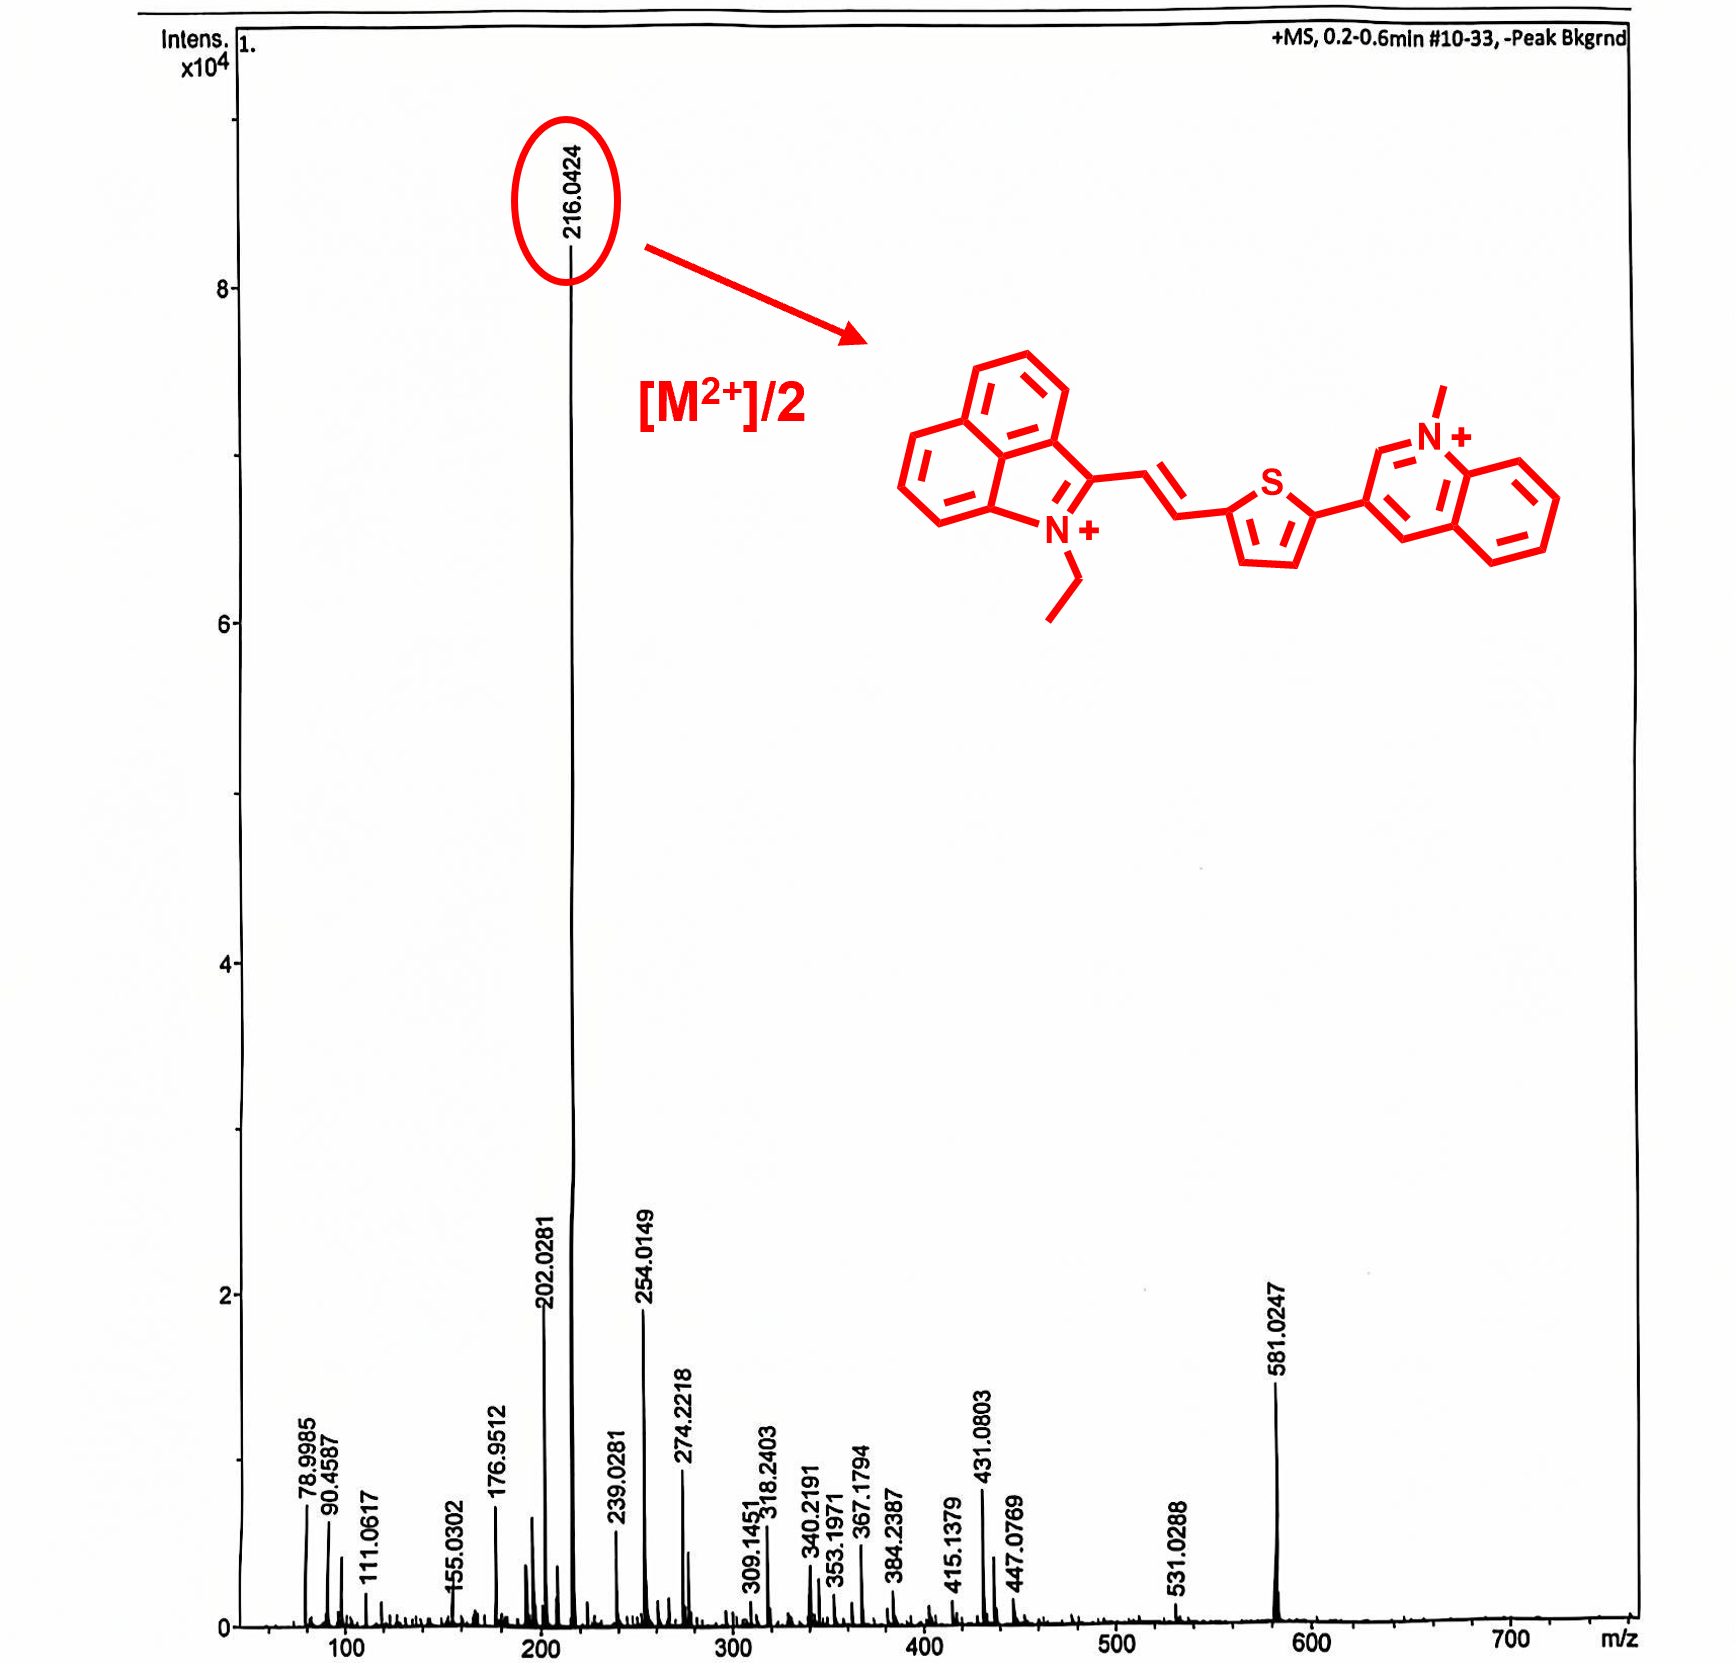


**Supplementary Fig 14.** The MS of **Cy-N**.


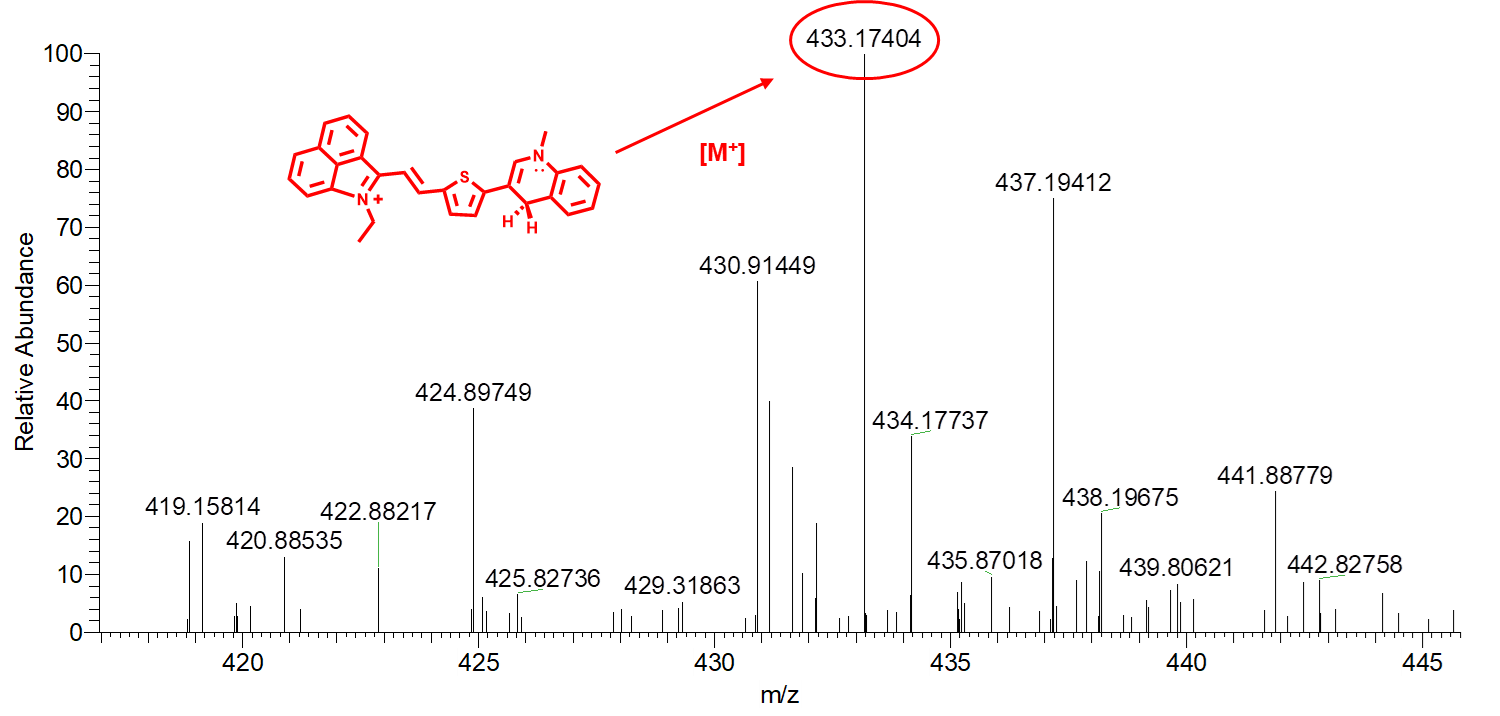


**Supplementary Fig 15.** The HRMS of the product after **Cy-N** reacted with NADH.
